1 Non-biological synthetic spike-in controls and the AMPtk software pipeline improve fungal high  
2 throughput amplicon sequencing data

3

4 Jonathan M. Palmer<sup>1\*</sup>, Michelle A. Jusino<sup>1\*</sup>, Mark T. Banik<sup>1</sup>, and Daniel L. Lindner<sup>1</sup>

5

6 <sup>1</sup> Center for Forest Mycology Research, US Forest Service, Madison, WI 53726, USA

7

8 \*authors contributed equally to this manuscript

9

10 Keywords:

11 Internal transcribed spacer, high throughput amplicon sequencing, fungi, environmental  
12 sequencing, non-biological synthetic mock community, spike-in control

13

14 Correspondence:

15 Jonathan Palmer [jmpalmer@fs.fed.us](mailto:jmpalmer@fs.fed.us)

16 Daniel Lindner [dlindner@fs.fed.us](mailto:dlindner@fs.fed.us)

17 1 Gifford Pinchot Drive

18 Madison, WI 53726

19

20

21 Total Word Count: 6,497

22 - Introduction: 1,026

23 - Methods: 1,774

24 - Results: 2,676

25 - Discussion: 989

26 - Acknowledgements: 32

27

28 Figures: 6

29 Tables: 1

30

31 Supplementary Figures: 3 color

32 Supplementary Tables: 5

33

34

35  
36  
37  
38  
39  
40  
41  
42  
43  
44  
45  
46  
47  
48  
49  
50  
51  
52  
53  
54  
55  
56  
57  
58

**Summary:**

- High throughput amplicon sequencing (HTAS) of conserved DNA regions is a powerful technique to characterize biological communities from environmental samples. Recently, spike-in mock communities have been used to measure accuracy of sequencing platforms and data analysis pipelines. The fungal internal transcribed spacer (ITS) region is difficult to sequence due to its variability (length and sequence divergence) across the fungal kingdom.
- To assess the ability of sequencing platforms and data processing pipelines using fungal ITS amplicons, we created two ITS spike-in control mock communities composed of single copy plasmid DNA: a biological mock community (BioMock), consisting of cloned ITS sequences, and a synthetic mock community (SynMock), consisting of non-biological ITS-like sequences.
- Using these spike-in controls we show that pre-clustering steps for variable length amplicons are critically important and a major source of bias is attributed to initial PCR reactions. These data suggest HTAS read abundances are not representative of starting values.
- We developed AMPtk (amplicon toolkit), a versatile software solution equipped to deal with variable length amplicons featuring a method to quality filter HTAS data based on spike-in controls. While we describe herein a non-biological (synthetic) mock community for ITS sequences, the concept can be widely applied to any HTAS dataset.

## 59 **Introduction:**

60 High-throughput amplicon sequencing (HTAS) is a powerful tool that is frequently used  
61 for examining community composition of environmental samples. HTAS has proven to be a  
62 robust and cost-effective solution due to the ability to multiplex hundreds of samples on a single  
63 next-generation sequencing (NGS) run. However, HTAS output from environmental samples  
64 requires careful interpretation and appropriate and consistent use of positive and negative  
65 controls (Nguyen *et al.*, 2015). One of the major challenges in HTAS is to differentiate  
66 sequencing error versus real biological sequence variation. Considerable progress has been  
67 made in the last several years through improved quality of sequencing results through  
68 manufacturer upgrades to reagents as well as improved quality filtering and “clustering”  
69 algorithms. While most algorithm development in HTAS is focused on the prokaryotic  
70 microbiome, using the 16S subunit of the rRNA array (e.g. QIIME (Caporaso *et al.*, 2010),  
71 Mothur (Schloss *et al.*, 2009), UPARSE (Edgar, 2013), DADA2 (Callahan *et al.*, 2016)), many of  
72 these same tools have been adopted for use with other groups of organisms, such as fungi.

73 The internal transcribed spacer (ITS) region of the rRNA array has emerged as the  
74 molecular barcode for examining fungal communities in environmental samples (Schoch *et al.*,  
75 2012). The ITS region is multi-copy and thus easily amplifiable via PCR even from  
76 environmental samples with low quantities of fungal DNA. The ITS region consists of two  
77 subunits, ITS1 and ITS2, and is generally conserved within a species yet possess enough  
78 variability to differentiate between species in many taxonomic groups. Because of its  
79 widespread use, several public databases are rich with reference fungal ITS sequences  
80 (Schoch *et al.*, 2012). However, there are several properties of the fungal ITS region that are  
81 potentially problematic for HTAS that include: i) fungi have variable cell wall properties making  
82 DNA extraction efficiency unequal for different taxa and/or cell types (hyphae, fruiting bodies,  
83 spores, etc) (Vesty *et al.*, 2017), ii) the number of nuclei per cell is variable between taxa (Roper  
84 *et al.*, 2011), iii) the number of copies of the rRNA array are different between taxa and in some  
85 cases isolates of the same taxa (Ganley & Kobayashi, 2007), iv) a single isolate can have  
86 multiple ITS sequences (intragenomic variability; (Simon & Weiss, 2008; Lindner & Banik,  
87 2011), v) the ITS region is highly variable in length, vi) ITS sequences vary in GC content, and  
88 vii) there are a variable number of homopolymer repeats. Additionally, current read lengths of  
89 next-generation sequencing platforms (Illumina Miseq currently covers ~ 500 bp (2 x 300) and  
90 Ion Torrent is 450 bp) are not long enough to cover the entire length of the ITS region, which is  
91 typically longer than 500 bp. However, conserved priming sites exist to amplify either the ITS1  
92 region or the ITS2 region, which has been shown to be sufficient for taxonomic identification.

93 While several studies have used the ITS1 region for HTAS, the ITS1 region contains introns in  
94 some taxa and thus to avoid potential bias it has been suggested that ITS2 region should be the  
95 preferred region for fungi (Taylor *et al.*, 2016) (Figure 1A).

96 Sequencing error is a known problem across NGS platforms used for HTAS. To address  
97 issues with sequencing error and reliability of results from HTAS, it has become increasingly  
98 common practice to use spiked-in “mock” community samples as positive controls for the  
99 parameterization and optimization of experimental workflows and data processing. Spike-in  
100 mock community controls for fungal ITS have been used (e.g., Amend *et al.*, 2010; Tonge *et al.*,  
101 2014; Nguyen *et al.*, 2015; Taylor *et al.*, 2016; De Filippis *et al.*, 2017), and have consisted of  
102 fungal genomic DNA (gDNA) extracted from tissue from fruiting bodies, cultures, or spores of a  
103 number of taxa which are then (usually) combined in equimolar amounts. Mock communities  
104 composed of fungal gDNA from fruiting bodies, spores, and/or hyphae provide a measure of  
105 success of extraction, PCR, and sequencing and thus are useful in the HTAS workflow.  
106 However, such mock communities are of limited value if used to validate/parameterize data  
107 processing workflows due to intrinsic properties of the ITS region mentioned previously (variable  
108 copy number, intraspecific variation, variable length, etc.). Therefore, there is a need for fungal  
109 ITS spike-in control mock communities that function to validate laboratory experimental design,  
110 validate data processing steps, and compare results between sequencing runs and platforms.

111 HTAS is cost-effective due to the ability to massively multiplex environmental samples  
112 on a single sequencing run. This process depends on the attachment of a unique sequence  
113 identifier (referred to as a barcode, an index, or a tag, depending on sequencing platform) to  
114 each piece of DNA to be sequenced. In recent years, “index-bleed (“index hopping”, “tag  
115 jumping”, “barcode jumping”, “tag switching”, or “barcode switching”) has been noted to occur  
116 on Roche 454 platforms as well as Illumina platforms (Kircher *et al.*, 2011; Carlsen *et al.*, 2012;  
117 Degnan & Ochman, 2012; Philippe *et al.*, 2015; Schnell *et al.*, 2015). Index-bleed can lead to  
118 over-estimation of diversity in environmental samples (Philippe *et al.*, 2015; Schnell *et al.*, 2015)  
119 and mis-assignment of sequences to samples. It has been noted that spike-in mock  
120 communities may be useful to help detect index-bleed, and subsequent filters may be applied  
121 for use with the HTAS pipeline of choice (Degnan & Ochman, 2012; Philippe *et al.*, 2015).

122 In this study, we generated a biological mock community (BioMock) composed of cloned  
123 ITS sequences (single insert plasmids) from a diverse set of fungal taxa. We show how this  
124 BioMock can be used to parameterize a data processing workflow. Subsequently, we found that  
125 current “off-the-shelf” software solutions performed poorly with our BioMock community of  
126 fungal ITS sequences and thus developed AMPtk (amplicon toolkit), which produces improved

127 results of variable length amplicons from HTAS. We demonstrate that read abundances are an  
128 unreliable proxy for measuring relative abundances in fungal communities on both Illumina and  
129 Ion Torrent sequencing platforms. Accurate measurement of index-bleed between samples can  
130 be accomplished by the use of a non-biological synthetic spike-in mock community consisting of  
131 ITS-like sequences (SynMock). Finally, we show how AMPtk paired with SynMock can be used  
132 to quality filter HTAS data by detecting and mitigating the effects of index-bleed among  
133 multiplexed samples.

134

## 135 **Materials and Methods:**

### 136 *Biological mock community (BioMock)*

137 To construct the Biomock we selected 26 identified fungal cultures (Supplementary  
138 Table S1) from the Center for Forest Mycology Research (CFMR) culture collection (US Forest  
139 Service, Madison, Wisconsin). These cultures were purposefully chosen to represent a  
140 taxonomic range of fungi, including paralogs, fungi with GC rich ITS regions, a variety of ITS  
141 lengths, and fungi with a variety of homopolymers in the ITS region. To measure the sensitivity  
142 of our bioinformatics approach, we also included two ITS sequences from *Leptoporus mollis* that  
143 were isolated from the same culture as an example of intragenomic variation in the fungal ITS  
144 region. These two sequences are more than 3% divergent (95.9% identical) and thus would  
145 typically represent separate operational taxonomic units (OTUs) in a clustering pipeline, despite  
146 being from the same fungal isolate. All cultures were grown on cellophane on malt extract agar,  
147 and DNA was extracted from pure cultures following (Lindner & Banik, 2008). Following  
148 extraction, the genomic DNA was PCR amplified using the fungal ITS specific primers ITS-1F  
149 (Gardes & Bruns, 1993) and ITS4 (White *et al.*, 1990). The PCR products were then cloned and  
150 Sanger sequenced using the ITS1-F primer following the protocol in (Lindner & Banik, 2011).  
151 Sequence identifications were verified via BLAST search and two clones of each isolate were  
152 selected and cultured in liquid LB (Luria-Bertani) media and incubated at 37 C for 24 hours.  
153 Plasmids were purified from the cultures in LB media using standard alkaline lysis. These  
154 plasmids will hereafter be termed “purified plasmids”. The purified plasmids were then Sanger  
155 sequenced with vector primers T7 and SP6 to verify the insertion of a single copy of the  
156 appropriate ITS fragment. We subsequently quantified the purified plasmid DNA concentration  
157 using a Qubit® 2.0 fluorometer and DNA concentrations were equilibrated to 10 nM using DNA-  
158 free molecular grade water. Following equilibration, 5 µl of each purified plasmid were combined  
159 to make an equimolar “biological mock” community of single-copy purified plasmids (BioMock).

160 PCR has known biases, which are related to different sequence characteristics and are  
161 hard to predict in mixed DNA communities of unknown composition. To illustrate the impact of  
162 initial PCR bias on the number of reads obtained from each member of a mixed DNA  
163 community, we generated individual HTAS-compatible PCR products from each Biomock  
164 plasmid which were subsequently mixed (post-PCR) in an equimolar ratio. This was  
165 accomplished by PCR amplifying each individual plasmid with the same barcoded primer set.  
166 PCR products were purified using E-gel® CloneWell™ 0.8% SYBR® Safe agarose gels  
167 (ThermoFisher), quantified using a Qubit® 2.0 fluorometer, and combined into an equimolar  
168 mixture post-amplification. This post-PCR combined mock community can be used to examine  
169 sequencing error on NGS platforms.

170

#### 171 *Non-biological mock community (SynMock)*

172 We used the well-annotated ribosomal RNA (rRNA) sequence from *Saccharomyces*  
173 *cerevisiae* as a starting point to design ITS-like synthetic sequences. The ITS adjacent regions  
174 of small subunit (SSU) and large subunit (LSU) of *S. cerevisiae* were chosen as anchoring  
175 points because of the presence of conserved priming sites ITS1/ITS1-F and ITS4. A 5.8S  
176 sequence was designed using *S. cerevisiae* as a base but nucleotides were altered so it would  
177 be compatible with several primers in the 5.8S region, including ITS2, ITS3, and fITS7. Random  
178 sequences were generated with constrained GC content and sequence length for the ITS1 and  
179 ITS2 regions. Twelve unique sequences were synthesized (Genescript) and cloned into pUC57  
180 harboring ampicillin resistance. The SynMock sequences and the script to produce them are  
181 available in the OSF repository (<https://osf.io/4xd9r/>) as well as packaged into AMPtk  
182 distributions. Each plasmid was purified by alkaline lysis, quantified, and an equimolar mixture  
183 was created as a template for HTAS library prep.

184

#### 185 *Preparation of HTAS libraries and NGS Sequencing*

186 HTAS libraries were generated using a proofreading polymerase, Pfx50 (ThermoFisher),  
187 and thermocycler conditions were as follows: initial denaturation of 94°C for 3 min, followed by  
188 11 cycles of [94°C for 30 sec, 60°C for 30 sec (drop 0.5°C per cycle), 68°C for 1 min], then 26  
189 cycles of [94°C for 30 sec, 55°C for 30 sec, and 68°C for 1 min], with a final extension of 68°C  
190 for 7 minutes. PCR products were cleaned using either E-gel® CloneWell™ 0.8% SYBR® Safe  
191 agarose gels (Life Technologies) or Zymo Select-a-size spin columns (Zymo Research). All  
192 DNA was quantified using a Qubit® 2.0 fluorometer with the high-sensitivity DNA quantification  
193 kit (Life Technologies).

194 A single step PCR reaction was used to create Ion Torrent compatible sequencing  
195 libraries, and primers were designed according to manufacturer's recommendations. Briefly, the  
196 forward primer was composed of the Ion A adapter sequence, followed by the Ion key signal  
197 sequence, a unique Ion Xpress Barcode sequence (10-12 bp), a single base-pair linker (A),  
198 followed by the fITS7 primer (Ihrmark *et al.*, 2012). The reverse primer was composed of the Ion  
199 trP1 adapter sequence followed by the conserved ITS4 primer (White *et al.*, 1990). Sequencing  
200 on the Ion Torrent PGM was done according to manufacturer's recommendations using an Ion  
201 PGM™ Hi-Q™ OT2 Kit, an Ion PGM™ Hi-Q™ Sequencing Kit, an Ion PGM™ sequencing chip  
202 (316v2 or 318v2), and raw data were processed with the Ion Torrent Suite v5.0.3 with the "--  
203 disable-all-filters" flag given to the BaseCaller. Libraries for Illumina MiSeq were generated by a  
204 two-step dual indexing strategy. All samples were PCR amplified with Illumina-fITS7 and  
205 Illumina-ITS4 primers. PCR products were cleaned and then dual-barcoded using an 8 cycle  
206 PCR reaction using the Illumina Nextera Kit and subsequently sequenced using 2 x 300 bp  
207 sequencing kit on the Illumina MiSeq at the University of Wisconsin Biotechnology Center DNA  
208 Sequencing Facility. All primers utilized in this study are available via the OSF repository  
209 (<https://osf.io/4xd9r/>).

210

#### 211 *Data processing using AMPtk*

212 AMPtk is publically available at <https://github.com/nextgenusfs/amptk>. All primary data  
213 and data analysis done in this manuscript is available via the Open Science Framework  
214 (<https://osf.io/4xd9r/>). AMPtk is written in Python and relies on several modules: edlib (Šošić &  
215 Šikic, 2017), biopython (Cock *et al.*, 2009), biom-format (McDonald *et al.*, 2012), pandas  
216 (McKinney), numpy (van der Walt *et al.*, 2011), and matplotlib modules (Hunter, 2007). External  
217 dependencies are USEARCH v9.1.13 (Edgar, 2010) or greater and VSEARCH v2.2.0 (Rognes  
218 *et al.*, 2016) or greater. In order to run the DADA2 (Callahan *et al.*, 2016) method R is required  
219 along with the shortRead (Morgan *et al.*, 2009) and DADA2 packages. The major steps for  
220 processing HTAS data are broken down into i) pre-processing reads, ii) clustering into OTUs, iii)  
221 filtering OTU table, and iv) assigning taxonomy.

222

223 *Pre-processing reads* – Data structures from Roche 454 and Ion Torrent are similar where  
224 reads are in a single file and have a unique barcode at the 5' end of the read followed by the  
225 gene-specific priming site; therefore, AMPtk processes reads from these two platforms very  
226 similarly. As a preliminary quality control step, only reads that have a valid barcode and forward  
227 primer are retained. Next, reverse primer sequences are removed and reads are trimmed to a



228 user-defined maximum length. Data from Illumina is processed differently because reads are  
229 most often paired-end reads and most sequencing centers provide users with de-multiplexed by  
230 sample paired-end data (i.e. output of 'bcl2fastq'). AMPtk first merges the paired end reads  
231 using USEARCH or VSEARCH, phiX spike-in control is removed with USEARCH, forward and  
232 reverse primers are removed if found, and all data are combined into a single file. Pre-  
233 processing reads in AMPtk from any of the sequencing platforms results in a single output file  
234 that is compatible with all downstream steps.

235

236 *Clustering reads into OTUs* – AMPtk is capable of running several different clustering algorithms  
237 including UPARSE, DADA2, UNOISE2, UNOISE3, and reference-based clustering. The  
238 algorithms all start with quality filtering using expected errors trimming and are modified slightly  
239 in AMPtk to build OTU tables using the original de-multiplexed data; therefore read counts  
240 represent what was in the sample prior to quality filtering. This is an important distinction, as  
241 expected errors quality trimming (Edgar & Flyvbjerg, 2015) can be rather stringent if long read  
242 lengths are used and the amplicons are of variable length.

243

244 *Index-bleed filtering of OTU tables* – Filtering in AMPtk works optimally when a spike-in mock  
245 community is sequenced in the dataset. While by default AMPtk is setup to work with the  
246 SynMock described herein, any spike-in mock community can be used. AMPtk identifies which  
247 OTUs belong to the mock community and calculate index-bleed of that mock community into  
248 other samples as well as bleed into the mock community from samples. This calculated index-  
249 bleed percentage is then used to filter the OTU table. Filtering is done on a per OTU basis, such  
250 that read counts in each OTU that are below the index-bleed threshold are set to zero as they  
251 fall within the range of data that could be attributed to index-bleed.

252

253 *Assigning taxonomy* - AMPtk is pre-configured with databases for fungal ITS, fungal LSU,  
254 arthropod mtCO1, and prokaryotic 16S; however custom databases are easily created with the  
255 'amptk database' command. Several tools are available for taxonomy assignment in AMPtk  
256 including remote blast of the NCBI nt database, RDP Classifier (Wang *et al.*, 2007), global  
257 alignment to a custom sequence database, UTX Classifier (RC Edgar,  
258 [http://drive5.com/usearch/manual9.2/cmd\\_utax.html](http://drive5.com/usearch/manual9.2/cmd_utax.html)), and the SINTAX Classifier (Edgar, 2016).  
259 The default method for taxonomy assignment in AMPtk is a "hybrid" approach that uses  
260 classification from global alignment, UTX, and SINTAX. The best taxonomy is then chosen as  
261 follows: i) if global alignment percent identity is > 97% then the top hit is retained, ii) if global



262 alignment percent identity is < 97%, then the best confidence score from UTX or SINTAX is  
263 used, iii) if there is disagreement between taxonomy levels assigned by each method then a  
264 least common ancestor (LCA) approach is utilized to generate a conservative estimate of  
265 taxonomy. AMPtk also can take a QIIME-like mapping file that can contain all the metadata  
266 associated with the HTAS study; the output is then a multi-fasta file containing taxonomy in the  
267 headers, a classic OTU table with taxonomy appended, and a BIOM file incorporating the OTU  
268 table, taxonomy, and metadata. The BIOM output of AMPtk is compatible with several  
269 downstream statistical and visualization software packages such as PhyloSeq (McMurdie &  
270 Holmes, 2013).

271

272 *Accessory scripts in AMPtk* - AMPtk has several additional features that will aid the user in  
273 analyzing HTAS data. For instance, AMPtk contains a script that will prepare data for  
274 submission to the NCBI SRA archive by formatting it properly and outputting a ready-to-submit  
275 SRA submission file. The FunGuild (Nguyen *et al.*, 2016) package which assigns OTUs to an  
276 annotated database of functional guilds is also incorporated directly into AMPtk. Additionally,  
277 users can draw a heatmap of an OTU table as well as summarize taxonomy in a stacked  
278 histogram.

279

## 280 **Results:**

### 281 *In silico analysis of the fungal ITS region*

282 To gain baseline data on potential amplicons of the ITS1 or ITS2 regions, the ITS1 and  
283 ITS2 regions were extracted using priming sites specific for each region (ITS1: ITS1-F and  
284 ITS2; ITS2: fITS7 and ITS4) from the UNITE+INSD v7.2 database (Abarenkov *et al.*, 2010)  
285 consisting of 736,375 ITS sequences. For comparison, the commonly sequenced V3-V4 region  
286 was extracted from prokaryotic 16S sequences from the Silva v128 database (Quast *et al.*,  
287 2013). A length histogram for each dataset as well as summary statistics were generated  
288 (Figure 1B; Table 1), indicating that all three of these molecular barcodes have an average  
289 length of ~ 250 bp (Table1); however, there was considerable variation in the lengths of the ITS  
290 region in comparison to the V3/V4 region of 16S (Figure 1B). Stretches of homopolymer  
291 sequences can also be problematic for some NGS platforms (454 and PGM), and thus the  
292 number of sequences in this dataset that contained homopolymer stretches greater than 6  
293 nucleotides were calculated (Table 1). Given the small percentage of ITS1 and ITS2 regions  
294 that are greater than 450 bp (the current upper limit of the Ion Torrent PGM platform), the  
295 number of taxa in the reference database that are unlikely to sequence on the Ion Torrent due

296 to amplicon length is relatively small (Table 1). Illumina MiSeq is now capable of paired end  
 297 bp read lengths (2 x 300); however, reads need to overlap for proper processing in NGS  
 298 software platforms and thus a ~ 500 bp size limit would also be able to sequence most taxa in  
 299 the reference database.

300

301 Table 1. Summary statistics of the fungal ITS molecular barcode in comparison to bacterial 16S.

| Region          | Num<br>Seqs | Avg Length (bp) | % HP <sup>1</sup> > 6 | % HP <sup>1</sup> > 8 | % > 450 bp |
|-----------------|-------------|-----------------|-----------------------|-----------------------|------------|
| ITS Full Length | 696 704     | 488             | 55.07%                | 8.66%                 | -          |
| ITS1            | 685 399     | 247             | 36.58%                | 5.60%                 | 3.27%      |
| ITS2            | 535 200     | 264             | 44.19%                | 5.54%                 | 0.83%      |
| 16S (V3/V4)     | 627 247     | 253             | 23.74%                | 1.02%                 | -          |

302 <sup>1</sup> HP: homopolymer stretches

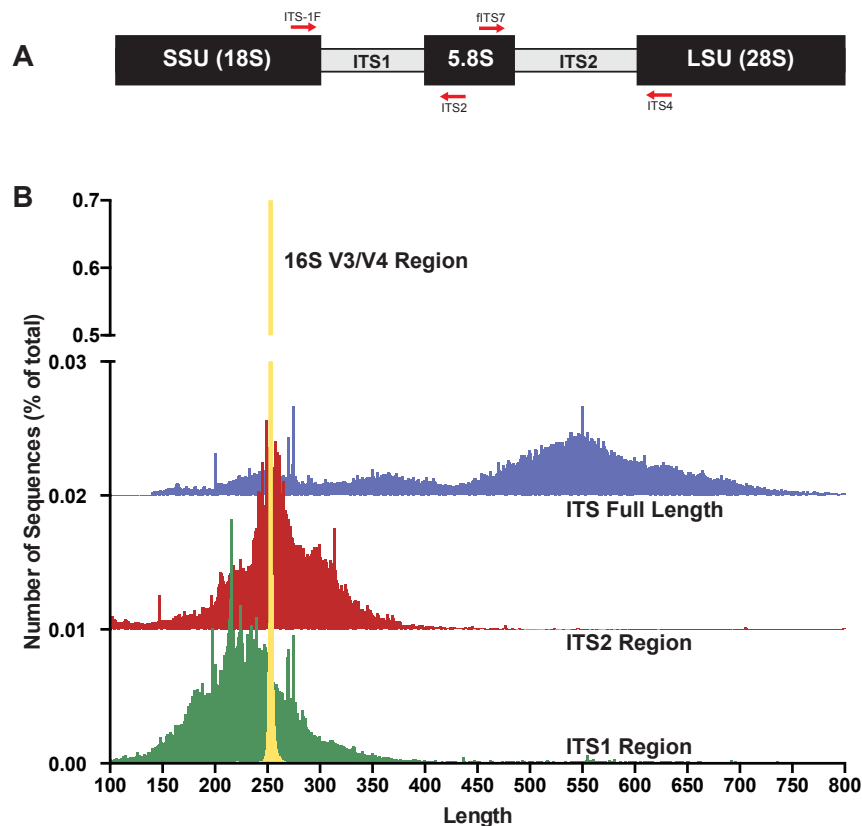

303

304 **Figure 1.** The fungal internal transcribed spacer (ITS) region of the rRNA array is highly variable  
 305 in length. (A) A schematic of the rRNA array highlights the conserved priming sites commonly  
 306 used to amplify either the ITS1 or ITS2 region. (B) Size distribution of full length ITS (blue), ITS1  
 307 (green), ITS2 (red) sequences in the UNITE v7.2 curated databases shown in comparison to the  
 308 bacterial 16S V3/V4 amplicon from the Silva v128 database. Current sequencing technologies  
 309 do not have read lengths long enough to capture full-length ITS sequences, and thus ITS1 or  
 310 ITS2 regions are used for fungal environmental community analysis. 16S V3/V4 in yellow; ITS  
 311 full length in blue, ITS2 in red, and ITS1 in green.

## 312 *Creation of a representative artificial fungal mock community (BioMock)*

313         Given the results from analysis of the UNITE datasets, we set out to create a  
314 representative ITS mock community to be used as a spike-in sequencing control to determine  
315 the quantitative nature of ITS HTAS and to measure the performance between the commonly  
316 used Illumina MiSeq platform versus the Ion Torrent PGM. To circumvent the problematic  
317 issues associated with the ITS region, we reasoned that cloned ITS sequences in plasmid form  
318 would allow for accurate quantification and pooling, thus providing a means to test the accuracy  
319 of the sequencer platforms and data processing workflows. Therefore, we cloned known ITS  
320 sequences from 26 cultures from the CFMR culture collection that varied in length (237 bp to  
321 548 bp), ranged in GC content (43.8% - 68.4%), and contained sequences with homopolymer  
322 stretches with one sequence containing two 9 bp stretches (Figure 4). These plasmids were  
323 combined into a BioMock and BioMock-standards as described in materials and methods  
324 section. The value of the BioMock-standards is that the library was combined after PCR, and  
325 thus the standards are free from PCR-induced artifacts that may arise from PCR of a mixed  
326 community.

327

## 328 *Existing data processing workflows perform poorly with fungal ITS sequences*

329         Clustering amplicons into operational taxonomic units (OTUs) is common practice in  
330 molecular ecology and there are many software solutions/algorithms (such as QIIME (Caporaso  
331 *et al.*, 2010), UPARSE (Edgar, 2013), Mothur (Schloss *et al.*, 2009), and DADA2 (Callahan *et al.*,  
332 2016)) that have been developed to deal appropriately with errors associated with next-  
333 generation sequencing platforms. Many studies using 16S amplicon data have focused on  
334 comparing clustering methods (Edgar, 2013; Callahan *et al.*, 2016), while others have focused  
335 on quality filtering reads prior to clustering (Edgar & Flyvbjerg, 2015). Therefore, we chose not  
336 to compare the different software algorithms here, but will briefly mention that when we did run  
337 our data through QIIME, the number of OTUs was highly over-estimated and the error rates  
338 were very high (Table S2). We were unable to run our data through Mothur due to the inability to  
339 do a multiple sequence alignment and subsequent distance matrix of the ITS region. The best  
340 performing clustering pipeline was UPARSE; however there were several issues with how the  
341 reads were pre-processed and quality filtered that lead to suboptimal results (Table S3 and  
342 Table S4). It is important to note that all of these software solutions have been built with 16S  
343 amplicons in mind and several have been optimized for Illumina data.

344         The major difference in 16S amplicons versus those of ITS1/ITS2 is that the lengths of  
345 16S amplicons are nearly identical, while ITS1/ITS2 amplicons vary in length (Figure 1B). This

346 distinguishing feature makes ITS sequences from diverse taxa impossible to align (Schoch *et*  
347 *al.*, 2012) and thus represents a major limitation in data processing. To illustrate the importance  
348 of properly pre-processing ITS data, we clustered using UPARSE the ITS1 and ITS2 regions  
349 using the UNITE reference database (Figure 2). Using the full length ITS1/ITS2 sequences as a  
350 benchmark, we then explored the outcome of trimming/truncating the sequences to different  
351 length thresholds, a common practice in OTU clustering pipelines. The UPARSE algorithm uses  
352 global alignment and as such terminal mismatches count in the alignment (as opposed to local  
353 alignment where terminal mismatches are ignored); thus the UPARSE pipeline expects that  
354 reads are truncated to a set length. UPARSE achieves this by truncating all reads to a set  
355 length threshold and discards reads that are shorter than the length threshold. Therefore real  
356 ITS sequences are discarded (Figure 2). We then came up with two potential solutions to fix this  
357 unintended outcome: i) truncate reads that were longer than the threshold and keep all shorter  
358 reads (full length), and ii) truncate longer reads and pad the shorter reads with N's out to the  
359 length threshold (padding). Using the UNITE v7.2 database of curated sequences (general  
360 release June 28<sup>th</sup>, 2017) as input, both "full-length" and "padding" improved UPARSE results  
361 with the "full length" method recovering more than 99% of the expected OTUs (Figure 2).  
362

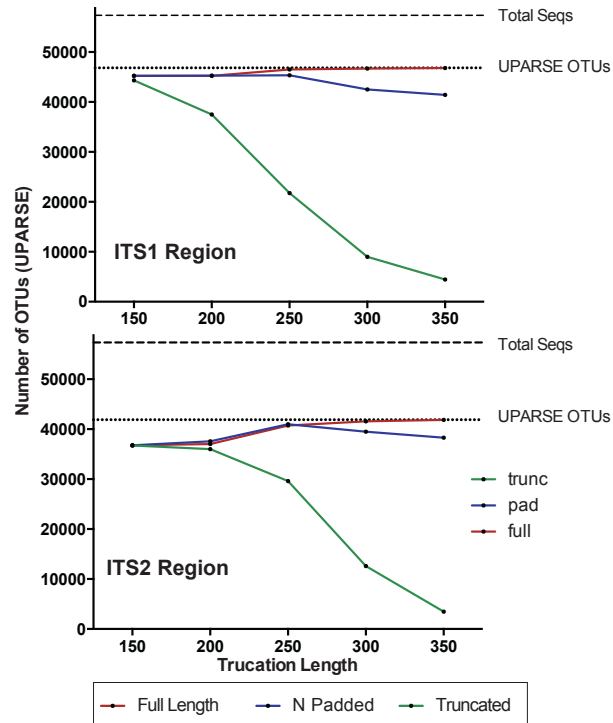

363

364 **Figure 2.** Pre-processing ITS sequences is critically important to accurately recover OTUs using  
365 the curated UNITE v7.2 reference database. ITS1 and ITS2 sequences were extracted from the  
366 UNITE v7.2 general fasta release database using 'AMPTk database'. Identical sequences were  
367 collapsed (dereplication) and remaining sequences were clustering using UPARSE  
368 ('cluster\_otus') to generate the total number of UPARSE OTUs expected for the ITS1 and ITS2  
369 regions. The data was then processed to five different lengths (150, 200, 250, 300, and 350 bp)  
370 and then clustered (UPARSE 'cluster\_otus') using i) default UPARSE truncation (longer  
371 sequences are truncated and shorter sequences are discarded), ii) padding with ambiguous  
372 bases (longer sequences truncated and shorter sequences padded with N's to length  
373 threshold), and iii) full-length sequences (longer sequences are truncated and shorter  
374 sequences are retained if reverse primer is found). Full-length and padding pre-processing  
375 sequences outperforms default UPARSE truncation.

376

377 Due to the intrinsic nature of the variable length ITS amplicons, we needed a data  
378 processing solution that would be flexible enough to maintain the full length of the reads, trim  
379 reads without data loss, prepare sequencing reads for downstream clustering algorithms, and  
380 support all major NGS platforms. Using the BioMock artificial communities as a means to  
381 validate the results of all data processing steps, we wrote a flexible series of scripts for  
382 processing Illumina, Ion Torrent, as well as Roche 454 data that are packaged into AMPtk  
383 ([amplicon tool kit](#)). A flow diagram of AMPtk is illustrated in Figure 3 and a more thorough  
384 description of AMPtk is provided in the material and methods section. A manual for AMPtk is  
385 available at <http://amptk.readthedocs.io/en/latest/>. After data is pre-processed with AMPtk via a

386 platform specific method, AMPtk then functions as a wrapper for several popular algorithms  
387 including UPARSE, DADA2, UNOISE2, and UNOISE3. All data presented in this manuscript  
388 were processed with AMPtk v1.0.1.  
389

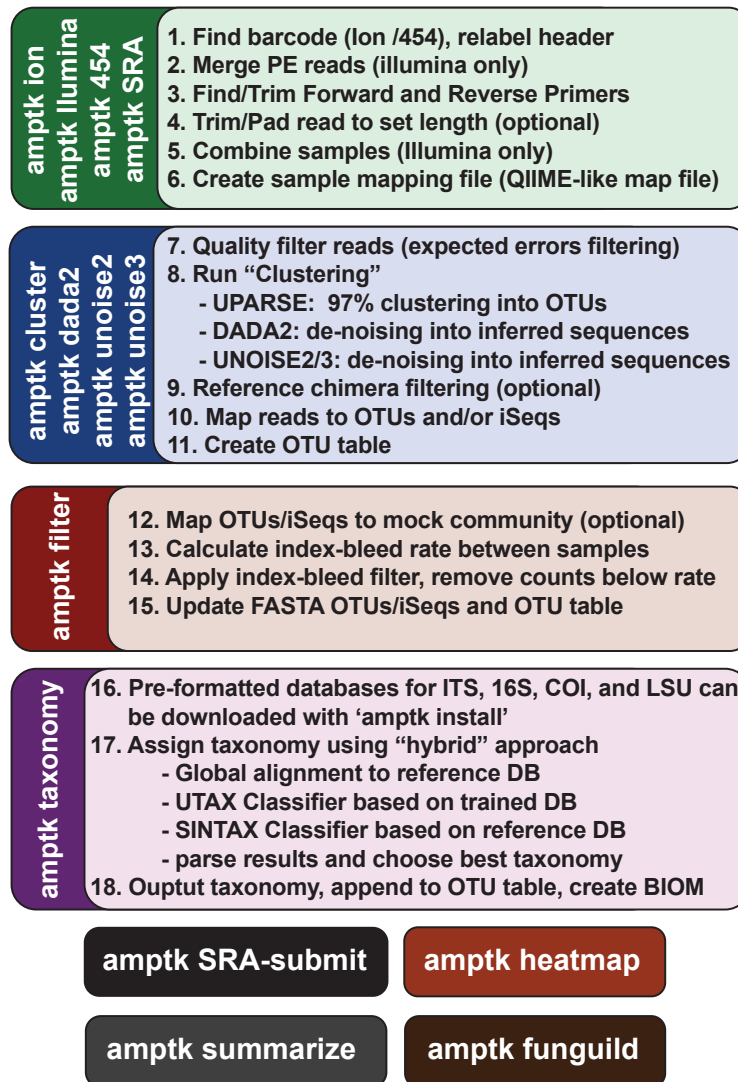

390  
391 **Figure 3.** Overview of the commands in AMPtk. AMPtk is built to be compatible with multiple  
392 sequencing platforms as well as contains several clustering algorithms.

393  
394 *Read abundances do not represent community abundances: PCR introduces bias*  
395 Next-generation sequencing platforms are quantitative if the library to be sequenced is  
396 unbiased, as is typically the case with RNA-sequencing and whole genome sequencing library  
397 prep protocols. However, PCR of mixed communities has long been shown to introduce bias in  
398 next-generation sequencing workflows (Aird *et al.*, 2011; Pinto & Raskin, 2012; Kebschull &

399 Zador, 2015). For HTAS this is an important caveat, as molecular ecologists are interested in  
400 diversity metrics of environmental communities as well as their relative abundance. Through the  
401 use of mock communities, several studies have pointed out that read abundance from fungal  
402 HTAS are not representative of relative biological abundance (Amend *et al.*, 2010; De Filippis *et*  
403 *al.*, 2017). However, it was recently reported that for a fungal ITS mock community of 8  
404 members, abundances were meaningful (Taylor *et al.*, 2016) and many studies continue to use  
405 abundance-based metrics to analyze HTAS, without giving any consideration to  
406 presence/absence-based metrics. We reasoned we could investigate this issue using the ITS  
407 BioMock artificial community, which would not suffer from bias associated with DNA extraction,  
408 ITS copy numbers, and intraspecific variation. We compared the relative read abundances of  
409 BioMock-standards to 3 different combinations of BioMock on both the Ion Torrent PGM and  
410 Illumina MiSeq platforms (Figure 4). The BioMock-standards consist of an equimolar mixture of  
411 26 PCR products, while the BioMock communities consist of an equimolar mixture of 23 single-  
412 copy plasmids. These data show that even in an extreme example of an equally mixed  
413 community of cloned ITS sequences, read abundance does not represent actual abundance in  
414 the mock community (Figure 4). The majority of the bias is introduced at the initial PCR step, as  
415 the pre-PCR combined BioMock-standards result in a more equal distribution of reads, albeit not  
416 a perfect distribution. We also tested PCR conditions, DNA concentrations, and sample  
417 reproducibility on the Ion Torrent PGM (Supplemental Figure S1). While the bias via PCR is  
418 consistent between sequencing platforms, there is no obvious correlation between length of the  
419 read, GC content, nor stretches of homopolymers affecting efficient PCR amplification. For  
420 example, *Wolfiporia dilatophya* (mock11) contains no homopolymer stretches larger than 5, has  
421 GC distribution of 54.6%, and is near the median in length, yet it does not PCR amplify well in  
422 the BioMock community (Figure 4). These data also show a size limitation in the Ion Torrent  
423 PGM workflow, as *Wolfiporia cocos* (mock 26) sequences very poorly due to its long ITS2  
424 region (Figure 5). Three members of the original 26 members of the BioMock community were  
425 dropped (mock24, mock25, mock26) due to persistent problems getting them to  
426 amplify/sequence in repeated HTAS on the Ion Torrent platform (Supplemental Figure S1).



| Species                           | ITS2 Length | GC Content | HP > 5 | ID     | Ion Torrent PGM |       |         |         | Illumina MiSeq |       |         |         |
|-----------------------------------|-------------|------------|--------|--------|-----------------|-------|---------|---------|----------------|-------|---------|---------|
|                                   |             |            |        |        | Stds            | MockA | Mock B1 | Mock B2 | Stds           | MockA | Mock B1 | Mock B2 |
| <i>Phialocephala fusca</i>        | 237         | 68.4%      | 0      | mock1  | 4905            | 19    | 6       | 1       | 8615           | 725   | 329     | 3337    |
| <i>Ascomycete sp.</i>             | 238         | 50.8%      | 0      | mock2  | 5106            | 11651 | 10809   | 11877   | 9174           | 20763 | 26129   | 18341   |
| <i>Phialocephala lagerbergii</i>  | 238         | 58.8%      | 0      | mock3  | 4886            | 13479 | 12111   | 13392   | 8648           | 28515 | 29482   | 21269   |
| <i>Helotiales sp.</i>             | 239         | 57.3%      | 0      | mock4  | 4233            | 15219 | 13048   | 14896   | 9050           | 27726 | 32576   | 24276   |
| <i>Aspergillus candidus</i>       | 260         | 65.8%      | 3      | mock5  | 2813            | 31    | 23      | 3       | 8992           | 147   | 122     | 269     |
| <i>Bjerkandera adusta</i>         | 281         | 51.2%      | 0      | mock6  | 3977            | 8112  | 7172    | 7787    | 13597          | 13112 | 13866   | 15067   |
| <i>Laetiporus caribensis</i>      | 283         | 52.7%      | 0      | mock7  | 3330            | 7810  | 6457    | 6365    | 9404           | 15035 | 16622   | 16385   |
| <i>Trametes gibbosa</i>           | 288         | 50.0%      | 1      | mock8  | 3637            | 7281  | 6914    | 6865    | 8137           | 13819 | 14579   | 14787   |
| <i>Laetiporus gilbertsonii</i>    | 290         | 54.1%      | 0      | mock9  | 4066            | 8831  | 10401   | 12638   | 8751           | 22860 | 21680   | 20682   |
| <i>Gloeoporus pannocinctus</i>    | 292         | 43.8%      | 0      | mock10 | 2603            | 2922  | 3025    | 2567    | 9718           | 11150 | 11792   | 14265   |
| <i>Wolfiporia dilatohypha</i>     | 293         | 54.6%      | 0      | mock11 | 3957            | 94    | 110     | 109     | 8775           | 243   | 224     | 194     |
| <i>Schizopora sp.</i>             | 293         | 48.1%      | 0      | mock12 | 4037            | 6965  | 7030    | 6626    | 8676           | 12857 | 13947   | 14860   |
| <i>Fomitopsis ochracea</i>        | 295         | 44.1%      | 0      | mock13 | 3689            | 2913  | 2860    | 2651    | 9471           | 5522  | 5432    | 6883    |
| <i>Laetiporus cremeiopus</i>      | 296         | 54.7%      | 0      | mock14 | 3922            | 10279 | 11920   | 12440   | 8262           | 16454 | 16390   | 16798   |
| <i>Phanerochaete laevis</i>       | 300         | 47.7%      | 1      | mock15 | 3863            | 6970  | 7650    | 6876    | 9242           | 15667 | 15543   | 18168   |
| <i>Laetiporus cincinnatus</i>     | 302         | 54.0%      | 0      | mock16 | 3133            | 5699  | 7645    | 7505    | 7675           | 16819 | 16157   | 14608   |
| <i>Punctularia strigosozonata</i> | 303         | 53.1%      | 0      | mock17 | 4019            | 8271  | 7688    | 8217    | 7669           | 10701 | 11572   | 11671   |
| <i>Phellinus cinereus</i>         | 314         | 49.7%      | 0      | mock18 | 3672            | 2937  | 2985    | 2597    | 9807           | 6314  | 5953    | 7496    |
| <i>Antrodiaella semisupina</i>    | 315         | 43.8%      | 1      | mock19 | 3089            | 3047  | 3406    | 2741    | 9297           | 9356  | 8990    | 11593   |
| <i>Leptoporus mollis</i>          | 315         | 45.4%      | 3      | mock20 | 3551            | 4969  | 4320    | 4028    | 9047           | 8847  | 8747    | 9987    |
| <i>Leptoporus mollis 2</i>        | 315         | 45.1%      | 1      | mock21 | 3776            | 207   | 366     | 249     | 9250           | 405   | 302     | 414     |
| <i>Mortierellales sp.</i>         | 353         | 45.0%      | 0      | mock22 | 3264            | 4668  | 4311    | 3812    | 9151           | 10865 | 9728    | 13365   |
| <i>Laetiporus persicinus</i>      | 379         | 51.2%      | 2      | mock23 | 2147            | 2651  | 2385    | 2053    | 6486           | 488   | 421     | 521     |
| <i>Penicillium nothofagi</i>      | 260         | 66.2%      | 1      | mock24 | 3644            | NA    | NA      | NA      | 8278           | NA    | NA      | NA      |
| <i>Metapochonia suchlasporia</i>  | 291         | 64.6%      | 1      | mock25 | 1976            | NA    | NA      | NA      | 2045           | NA    | NA      | NA      |
| <i>Wolfiporia cocos</i>           | 548         | 59.7%      | 0      | mock26 | 7               | NA    | NA      | NA      | 5979           | NA    | NA      | NA      |

427

428 **Figure 4.** Read abundance is an unreliable proxy for actual abundance within a mixed  
429 community. Using an equimolar mixture of cloned ITS sequences in plasmid form (MockA,  
430 MockB1, MockB2) in comparison to equimolar mixture of individual PCR products (Stds)  
431 illustrates that the initial PCR reaction during library preparation heavily biases the read  
432 abundance obtained after sequencing on both the Ion Torrent PGM and Illumina MiSeq  
433 platforms. While read abundances are unreliable, all members of the mock community were  
434 recovered. MockA represents a 1:16,000 dilution and MockB1/MockB2 are replicates of a  
435 1:32,000 dilution of the BioMock community. The Ion Torrent PGM platform has a length  
436 threshold of approximately 450 bp; therefore longer amplicons like *Wolfiporia cocos* ITS2  
437 sequence very poorly.

438 In HTAS experiments, considerable effort is made to try to sequence to an equal depth  
439 for each sample. However, in practice this rarely works perfectly and thus a typical HTAS  
440 dataset has a 2-4X range in number of reads per sample. The depth of sequence range for the  
441 HTAS runs presented here is within a range of 2X for each run and the smallest number of

442 reads per sample in any of our sequencing runs was nearly 60,000 (Supplemental Table S5).  
443 Unequal sequencing depth has been used as rationale for explaining the lack of correlation  
444 between read abundance and actual abundance. Therefore, random subsampling of reads in  
445 each sample prior to clustering (also called rarefying) has been widely used in the literature,  
446 despite a compelling statistical argument that this method is flawed (McMurdie & Holmes,  
447 2014). Randomly subsampling reads for each sample using our BioMock community yielded  
448 nearly identical results (Supplemental Figure S2). Sequencing depth has been shown to be an  
449 important variable for HTAS experiments (Smith & Peay, 2014), therefore we typically employ a  
450 5,000 reads per sample cutoff when processing environmental datasets.

451

#### 452 *A non-biological (synthetic) mock community to measure index-bleed among samples*

453 Index-bleed is a phenomenon that has been described on Roche 454 platform (Carlsen  
454 *et al.*, 2012) as well as Illumina platforms (Kircher *et al.*, 2012; Wright & Vetsigian, 2016). A  
455 consensus on a mechanism of index-bleed during the sequencing run has yet to be reached.  
456 Index-bleed is a significant challenge to overcome as sample crossover has the potential to  
457 over-estimate diversity and lead to inaccurate representations of microbial communities,  
458 especially considering that read abundance is an unreliable proxy for biological abundance  
459 (Figure 4). Using our BioMock sequencing results, we also discovered this phenomenon on both  
460 Ion Torrent and Illumina platforms. We calculated the rate of index-bleed in our BioMock Ion  
461 Torrent sequencing run to be 0.033% and on Illumina MiSeq between 0.233% and 0.264%. We  
462 also confirmed that index-bleed was happening on the Illumina flow-cell by re-running a subset  
463 of samples that had shown high index-bleed on different flowcell that did not contain the  
464 BioMock (Supplemental Figure S3). One problem that we noticed in measuring index-bleed  
465 using a mock community of actual ITS sequences (BioMock) was that these same taxa in the  
466 mock community could be present in environmental samples, which would lead to inaccurate  
467 estimation of index-bleed. In our environmental data, it was likely that at least one of the  
468 BioMock members was present in several of the environmental samples, suggesting the  
469 calculated index-bleed could be over-estimated. To overcome this problem, we designed a non-  
470 biological (synthetic) mock community composed of ITS-like sequences that contained  
471 conserved priming sites (SSU and LSU regions), ITS1 region, 5.8S region, and an ITS2 region  
472 (Figure 6). We designed the ITS1 and ITS2 portions of the sequences to be non-biological; that  
473 is, no similar sequences are known to occur in nature (based on searches of known databases  
474 and based on the infinitesimally low probability that a randomly generated sequence would  
475 match something found in nature) and therefore these non-biological sequences can be used to

476 accurately track index-bleed in HTAS studies. Using the summary statistics from the analysis of  
 477 the UNITE reference database for guidance, we also varied the length, GC content, and  
 478 homopolymer stretches to be representative of real ITS sequences.

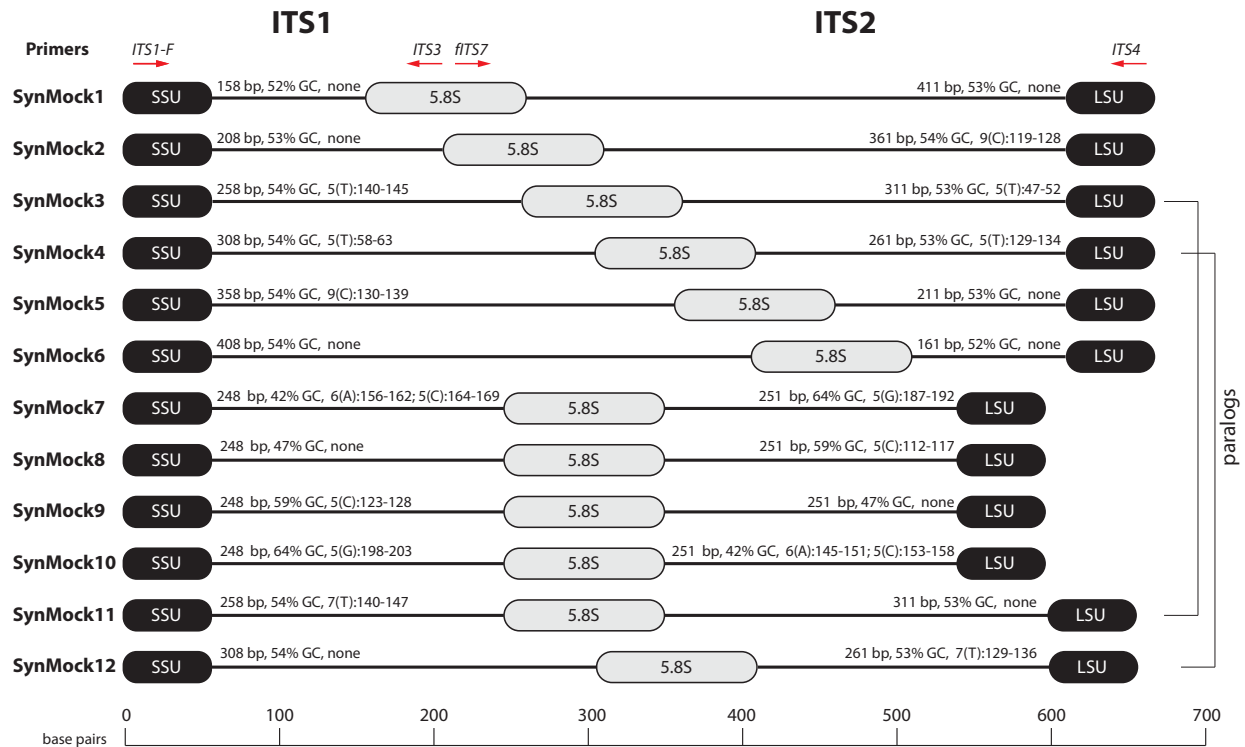

479  
 480 **Figure 5.** Schematic drawing of the 12-member non-biological synthetic mock community  
 481 (SynMock). Conserved priming sites for either ITS1 or ITS2 amplicons are retained for  
 482 versatility. The length distribution, GC content, and homopolymer stretches are representative of  
 483 curated public databases, however, the sequences are non-biological and thus not found in  
 484 nature.

485 The SynMock was tested as a spike-in control on both the Ion Torrent and Illumina  
 486 MiSeq platforms. The raw data were processed using AMPtk and clustered using UPARSE.  
 487 These data illustrate that the synthetic sequences are able to be processed simultaneously with  
 488 real ITS sequences and provide a way to track the level of index-bleed between multiplexed  
 489 samples (Figure 6). The increased benefit of being able to track the SynMock sequences as  
 490 they “bleed” out of the sample allows for a more accurate measurement of index-bleed. Using  
 491 default Illumina de-multiplexing (allowing 1 mismatch in the index sequence), index-bleed using  
 492 the SynMock community was 0.072% (Figure 6C). To determine if allowing mismatches in the  
 493 index reads was increasing index-bleed, we reprocessed the data with 0 mismatches and found  
 494 that index-bleed was reduced to 0.046%. While index-bleed was reduced by nearly half, the  
 495 tradeoff was that 0 mismatches resulted in approximately 10% fewer reads. For most datasets,  
 496 a loss of 10% of the sequencing reads should not be problematic, especially if the benefit is to

497 reduce index-bleed in the data. We noted that in our Illumina dual-indexing library prep that  
498 there was increased index-bleed on samples that had a shared reverse index (i7), suggesting  
499 that errors are increased at later stages of an Illumina sequencing run (Figure 6B). A similar  
500 pattern was observed with Ion Torrent PGM data, although not as drastic. Allowing 1 mismatch  
501 in the barcode resulted in 0.167% index-bleed while allowing 0 mismatches in the barcode  
502 resulted in 0.156% index-bleed (Figure 6C). While these data would suggest that index-bleed is  
503 perhaps higher in Ion Torrent PGM datasets, we have subsequently used the SynMock on more  
504 than 10 different HTAS Ion Torrent PGM experiments and have since seen much lower levels of  
505 index-bleed, occasionally approaching 0% index-bleed.

506 Many environmental samples can contain hundreds of taxa and thus a legitimate  
507 concern is that the 12 member SynMock community does not represent a realistic community in  
508 terms of diversity in a sample. To test if the SynMock was able to be recovered in a more  
509 complex community, we mixed SynMock together with two environmental samples that had  
510 more than 200 OTUs in previous sequencing runs. These mixed samples show that SynMock  
511 could be recovered from a complex community and the sequences behave like real ITS  
512 sequences (Figure 6A). While many studies have set a read count threshold to filter “noisy” data  
513 from OTU tables, this threshold has been typically selected arbitrarily, i.e. OTUs with read  
514 counts less than 100 or less than 10% of the total, etc. Use of the SynMock spike-in control  
515 allowed for data driven thresholds to be measured and moreover for the ability to filter the OTU  
516 table based on the calculated index-bleed. The AMPtk filter command calculates index-bleed by  
517 mapping the OTUs to the mock community and then provides a way to filter the OTU table  
518 based on this calculated value. AMPtk filters across each OTU in the table such that difficult to  
519 sequence or “low abundance” OTUs are not indiscriminately dropped. Taken together, these  
520 data illustrate the utility of a non-biological mock community in parameterizing data processing  
521 steps and importantly providing a method in AMPtk to reduce index-bleed from HTAS datasets.  
522 AMPtk provides an easy to use method to accurately process variable length amplicons, cluster  
523 them into OTUs or denoise sequences, generate an OTU table, filter the OTU table for index-  
524 bleed, and assign taxonomy.

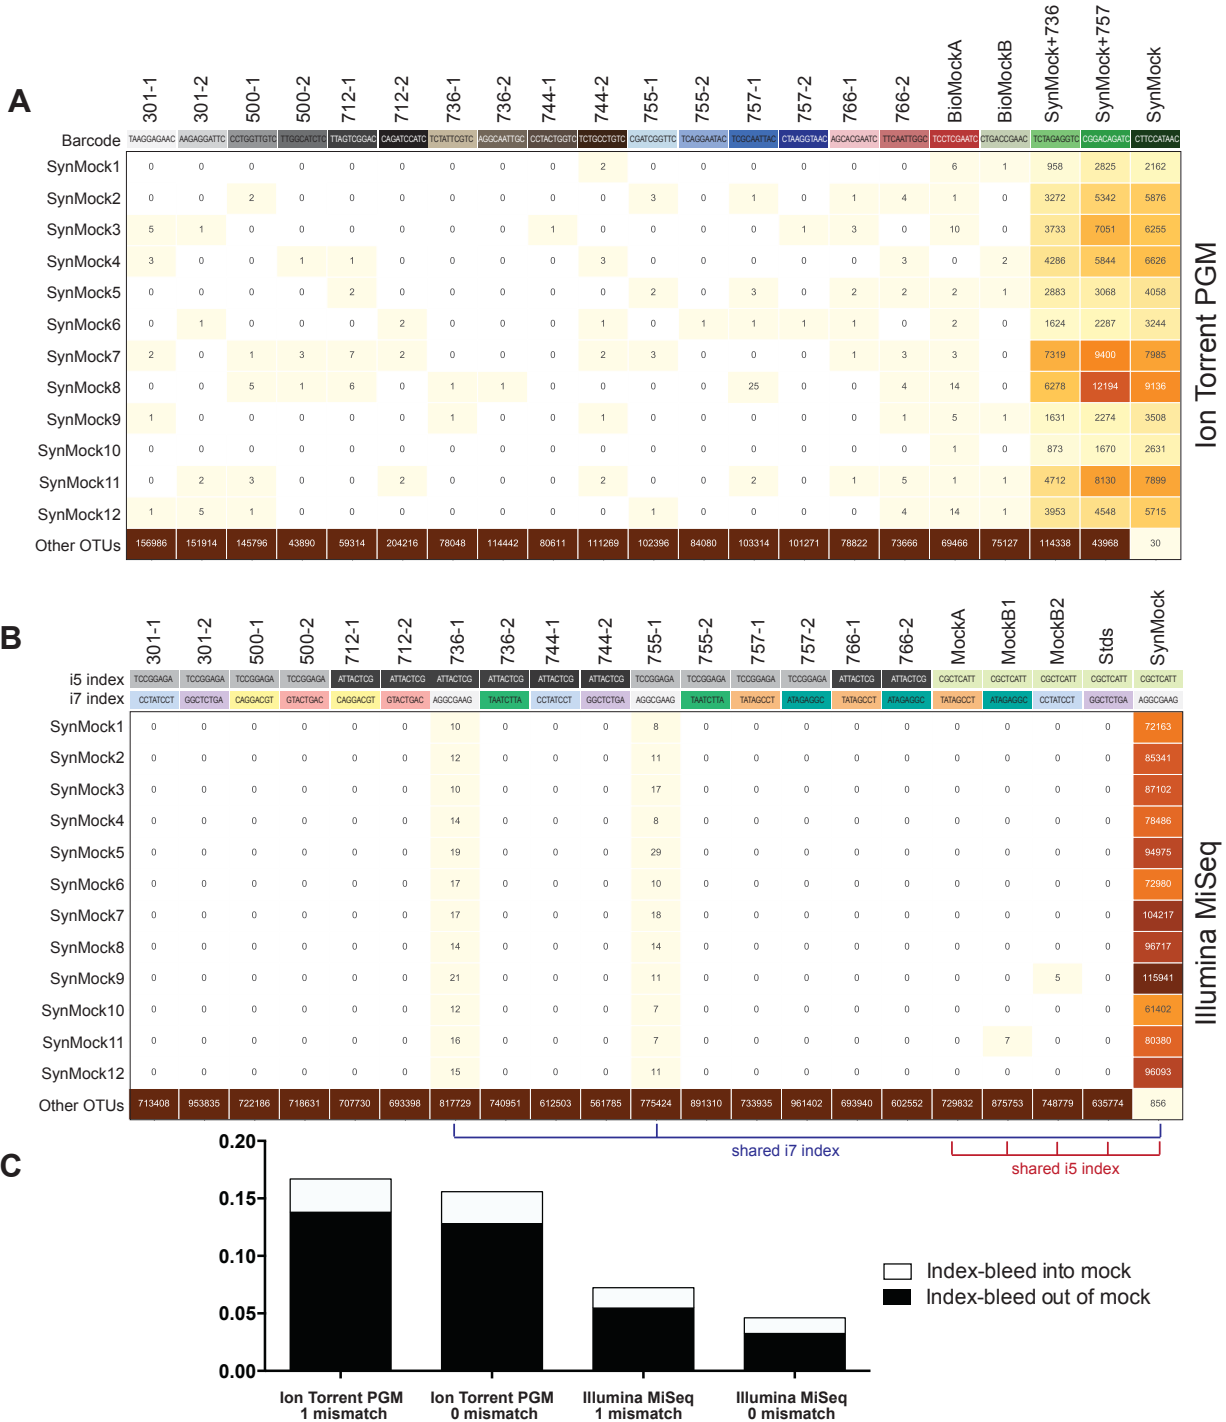

534 SynMock spike-in control, where AMPtk will measure both index-bleed into the SynMock as well  
535 as index-bleed into other samples. These calculated values are then used by AMPtk to filter an  
536 OTU table to remove read counts that fall below the index-bleed threshold. Index-bleed is  
537 reduced if 0 mismatches are allowed in the barcode/index sequence, however, this is still not  
538 sufficient to reduce all index-bleed.

539

## 540 **Discussion**

541 HTAS studies have the goal of measuring environmental diversity; however, there are  
542 technical limitations that need to be understood in order to reach justifiable conclusions. Mock  
543 communities and negative controls have been shown to have great utility for HTAS studies, and  
544 expanding upon this concept, we present a non-biological synthetic mock community of ITS-like  
545 sequences for use as a technical spike-in control for fungal biodiversity studies. Additionally, we  
546 describe AMPtk, a software tool kit for analyzing variable length amplicons such as the fungal  
547 ITS1 or ITS2 molecular barcodes. These two tools can be coupled together to validate data  
548 processing pipelines and reduce index-bleed from OTU tables prior to downstream community  
549 ecology analyses. The concept of a non-biological synthetic spike-in control can be expanded to  
550 many different genes and organisms, including 16S for microbiome studies.

551 The ITS region is widely used as a molecular barcode in fungal biodiversity studies as it  
552 is easy to amplify and public reference databases are robust. However, HTAS with the ITS  
553 region presents some unique challenges due to variability in sequence characteristics such as  
554 length and copy number. Most HTAS software development and optimization has been focused  
555 on the 16S molecular barcode, a region that is near uniform in length across prokaryotic taxa.  
556 Thus, there is a need for a software solution that can more accurately account for variable  
557 length amplicons. We developed a single-copy mock community based on cloned ITS  
558 sequences as a tool to validate and compare different NGS platforms and data processing  
559 pipelines. Using an artificial single-copy mock community of cloned ITS sequences in plasmids  
560 (BioMock), we determined that the core clustering/denoising algorithms work for variable length  
561 amplicons; however, pre-processing techniques widely used for uniform length amplicons  
562 introduce significant error into the pipelines. Simplifying the pre-processing of sequencing reads  
563 (i.e., identifying unique sequence barcodes, forward/reverse primers, and trimming reads to a  
564 uniform length without data loss) resulted in large improvement in downstream OTU clustering.  
565 The pre-processing of reads prior to quality filtering is critical for variable length amplicons and  
566 is implemented in AMPtk.

567 Proper pre-processing of variable length amplicons improves clustering results  
568 substantially. However, the BioMock results illustrated that read abundances obtained from



569 HTAS are not a reliable proxy for inferring biological relative abundance. These data do support  
570 use of presence/absence (binary) metrics as we were able to recover all members of our mock  
571 community, even when they were spiked into a diverse environmental sample. We identified the  
572 initial PCR reaction (library construction) as the major source of read number bias, a conclusion  
573 consistent with the literature (Polz & Cavanaugh, 1998; Wu *et al.*, 2010; Jusino *et al.*, 2017). To  
574 reduce PCR artifacts for any assay it is generally accepted that one should use the fewest  
575 cycles possible, the most concentrated DNA possible, and it has been suggested to use a  
576 proofreading polymerase (Oliver *et al.*, 2015). We have tested DNA concentration and PCR  
577 cycle numbers for HTAS library generation and subsequent sequencing on the Ion Torrent PGM  
578 platform, and our results were consistent with these general guidelines (Supplemental Figure  
579 S1). However, following these guidelines is not sufficient to reduce the bias in read abundance  
580 from a mixed community from PCR. The Ion Torrent PGM platform currently has an amplicon  
581 size limit of ~ 450 bp, and thus some very large ITS sequences are difficult to sequence.  
582 However, there are only a small number of known ITS1 or ITS2 sequences that are longer than  
583 450 bp (Table 1) and therefore either platform, Ion Torrent or MiSeq, provided similar results  
584 under the conditions tested.

585 Index-bleed has recently been acknowledged by Illumina ([https://tinyurl.com/illumina-](https://tinyurl.com/illumina-hopping)  
586 [hopping](https://tinyurl.com/illumina-hopping)), although they limit their acknowledgement to a new flow cell on the HiSeq and  
587 NovaSeq platforms. Several studies have shown that older instruments/flowcells have also  
588 shown index-bleed, albeit at a much lower rate (Kircher *et al.*, 2012; Wright & Vetsigian, 2016)  
589 and index-bleed has been identified on Roche 454 (Carlsen *et al.*, 2012). Here we report a low  
590 rate of index-bleed on both Ion Torrent and Illumina MiSeq platforms. While the effective rate of  
591 index-bleed is low (< 0.2%), coupled with the fact that read number is not a reliable proxy of  
592 community abundance, index-bleed in datasets being analyzed by presence-absence metrics is  
593 a problematic scenario. To identify and combat index-bleed, we created a non-biological  
594 synthetic mock community (SynMock) of ITS-like sequences that behave like real ITS  
595 sequences during the HTAS workflow. Because the SynMock sequences are not known to  
596 occur in nature, they can be effectively used to measure index-bleed in a sequencing run. A  
597 similar approach was recently described for 16S amplicons using synthesized oligonucleotides  
598 (Kim *et al.*, 2017). We propose that HTAS studies of fungal ITS communities should employ  
599 SynMock or a similar non-biological mock community as a technical control. Additional controls  
600 such as a biological mock community of mixed fruiting bodies, spores, hyphae, etc. of taxa of  
601 interest are also useful if the experiment is designed to identify the prevalence of particular taxa.



602           The bioinformatics pipeline presented here, AMPtk, was developed to specifically  
603 address the quality issues that we have identified by using spike-in mock communities and to  
604 provide the scientific community with a necessary tool to study fungal community diversity.  
605 AMPtk is a flexible solution that can be used to study other regions used in HTAS, such as  
606 mitochondrial cytochrome oxidase 1 (mtCO1) of insects and the large subunit (LSU) of the  
607 rRNA array. The goal of AMPtk is to reduce data processing to a few simple steps and to  
608 improve the output of HTAS studies. Due to the inherent properties of HTAS and the ITS  
609 molecular barcode, we take the position that studies of this nature should be used as a  
610 preliminary survey of which taxa present in an ecosystem and that inferring relative abundance  
611 from read numbers should be considered cautiously. To understand relative abundance of  
612 particular taxa in a community, additional independent assays such as taxa specific qPCR or  
613 digital PCR are warranted.

614

#### 615 **Acknowledgements**

616 We sincerely thank Rita Rentmeester for assisting with the growth of some the cultures used to  
617 create the biological mock community. Funding was provided by the US Forest Service,  
618 Northern Research Station.

619

#### 620 **Data availability**

621 Raw sequencing reads and data processing scripts are available at the Open Science  
622 Framework at <https://osf.io/4xd9r/>. Data will be deposited in NCBI SRA prior to publication.

623

#### 624 **Author Contributions**

625 All authors conceived and designed the experiments. MAJ and MTB conducted laboratory  
626 experiments. JMP analyzed sequence data and wrote AMPtk. JMP wrote the paper with input  
627 from all authors.

628

#### 629 **Competing financial interests**

630 The authors declare no competing financial interests.

631

632

633 **Literature Cited**

634

- 635 **Abarenkov K, Henrik Nilsson R, Larsson K-H, Alexander IJ, Eberhardt U, Erland S,**  
636 **Høiland K, Kjølner R, Larsson E, Pennanen T, et al. 2010.** The UNITE database for  
637 molecular identification of fungi—recent updates and future perspectives. *The New*  
638 *phytologist* **186**(2): 281-285.
- 639 **Aird D, Ross MG, Chen W-S, Danielsson M, Fennell T, Russ C, Jaffe DB, Nusbaum C,**  
640 **Gnrirke A. 2011.** Analyzing and minimizing PCR amplification bias in Illumina  
641 sequencing libraries. *Genome Biology* **12**(2): R18.
- 642 **Amend AS, Seifert KA, Bruns TD. 2010.** Quantifying microbial communities with 454  
643 pyrosequencing: does read abundance count? *Molecular Ecology* **19**(24): 5555-5565.
- 644 **Callahan BJ, McMurdie PJ, Rosen MJ, Han AW, Johnson AJA, Holmes SP. 2016.** DADA2:  
645 High-resolution sample inference from Illumina amplicon data. *Nature Methods*.
- 646 **Caporaso JG, Kuczynski J, Stombaugh J, Bittinger K, Bushman FD, Costello EK, Fierer**  
647 **N, Peña AG, Goodrich JK, Gordon JI, et al. 2010.** QIIME allows analysis of high-  
648 throughput community sequencing data. *Nature Methods* **7**(5): 335-336.
- 649 **Carlsen T, Aas AB, Lindner D, Vrålstad T, Schumacher T, Kauserud H. 2012.** Don't make a  
650 mista(g)ke: is tag switching an overlooked source of error in amplicon pyrosequencing  
651 studies? *Fungal Ecology* **5**(6): 747-749.
- 652 **Cock PJA, Antao T, Chang JT, Chapman BA, Cox CJ, Dalke A, Friedberg I, Hamelryck T,**  
653 **Kauff F, Wilczynski B, et al. 2009.** Biopython: freely available Python tools for  
654 computational molecular biology and bioinformatics. *Bioinformatics (Oxford, England)*  
655 **25**(11): 1422-1423.
- 656 **De Filippis F, Laiola M, Blaiotta G, Ercolini D. 2017.** Different amplicon targets for  
657 sequencing-based studies of fungal diversity. *Applied and Environmental Microbiology*.
- 658 **Degnan PH, Ochman H. 2012.** Illumina-based analysis of microbial community diversity. *The*  
659 *ISME journal* **6**(1): 183-194.
- 660 **Edgar R. 2016.** SINTAX: a simple non-Bayesian taxonomy classifier for 16S and ITS  
661 sequences. *bioRxiv*: 074161.
- 662 **Edgar RC. 2010.** Search and clustering orders of magnitude faster than BLAST. *Bioinformatics*  
663 **26**(19): 2460-2461.
- 664 **Edgar RC. 2013.** UPARSE: highly accurate OTU sequences from microbial amplicon reads.  
665 *Nature Methods* **10**(10): 996-998.
- 666 **Edgar RC, Flyvbjerg H. 2015.** Error filtering, pair assembly and error correction for next-  
667 generation sequencing reads. *Bioinformatics*.
- 668 **Ganley ARD, Kobayashi T. 2007.** Highly efficient concerted evolution in the ribosomal DNA  
669 repeats: total rDNA repeat variation revealed by whole-genome shotgun sequence data.  
670 *Genome Research* **17**(2): 184-191.
- 671 **Gardes M, Bruns T. 1993.** ITS primers with enhanced specificity for basidiomycetes -  
672 application to the identification of mycorrhizae and rusts. *Molecular Ecology* **2**: 113-118.
- 673 **Hunter JD. 2007.** Matplotlib: A 2D Graphics Environment. *Computing in Science & Engineering*  
674 **9**(3): 90-95.
- 675 **Ihrmark K, Bödeker IT, Cruz-Martinez K, Friberg H, Kubartova A, Schenck J, Strid Y,**  
676 **Stenlid J, Brandström-Durling M, Clemmensen KE. 2012.** New primers to amplify the  
677 fungal ITS2 region—evaluation by 454-sequencing of artificial and natural communities.  
678 *FEMS Microbiology Ecology* **82**(3): 666-677.
- 679 **Jusino M, Banik M, Palmer J, Wray A, Xiao L, Pelton E, Barber J, Kawahara A, Gratton C,**  
680 **Peery M, et al. 2017.** An improved method for utilizing high-throughput amplicon  
681 sequencing to determine the diets of insectivorous animals. *PeerJ Preprints* **5**:  
682 e3184v3181.

- 683 **Kebschull JM, Zador AM. 2015.** Sources of PCR-induced distortions in high-throughput  
684 sequencing data sets. *Nucleic Acids Research* **43**(21): e143.
- 685 **Kim D, Hofstaedter CE, Zhao C, Mattei L, Tanes C, Clarke E, Lauder A, Sherrill-Mix S,**  
686 **Chehoud C, Kelsen J, et al. 2017.** Optimizing methods and dodging pitfalls in  
687 microbiome research. *Microbiome* **5**(1): 52.
- 688 **Kircher M, Heyn P, Kelso J. 2011.** Addressing challenges in the production and analysis of  
689 illumina sequencing data. *BMC Genomics* **12**: 382.
- 690 **Kircher M, Sawyer S, Meyer M. 2012.** Double indexing overcomes inaccuracies in multiplex  
691 sequencing on the Illumina platform. *Nucleic Acids Research* **40**(1): e3.
- 692 **Lindner DL, Banik MT. 2008.** Molecular phylogeny of *Laetiporus* and other brown rot polypore  
693 genera in North America. *Mycologia* **100**(3): 417-430.
- 694 **Lindner DL, Banik MT. 2011.** Intragenomic variation in the ITS rDNA region obscures  
695 phylogenetic relationships and inflates estimates of operational taxonomic units in genus  
696 *Laetiporus*. *Mycologia* **103**(4): 731-740.
- 697 **McDonald D, Clemente JC, Kuczynski J, Rideout JR, Stombaugh J, Wendel D, Wilke A,**  
698 **Huse S, Hufnagle J, Meyer F, et al. 2012.** The Biological Observation Matrix (BIOM)  
699 format or: how I learned to stop worrying and love the ome-ome. *Gigascience* **1**(1): 7.
- 700 **McKinney W** Data structures for statistical computing in Python. *Proceedings of the 9th Python*  
701 *in Science Conference*. 51-56.
- 702 **McMurdie PJ, Holmes S. 2013.** phyloseq: an R package for reproducible interactive analysis  
703 and graphics of microbiome census data. *PLoS One* **8**(4): e61217.
- 704 **McMurdie PJ, Holmes S. 2014.** Waste not, want not: why rarefying microbiome data is  
705 inadmissible. *PLoS Computational Biology* **10**(4): e1003531.
- 706 **Morgan M, Anders S, Lawrence M, Aboyoun P, Pagès H, Gentleman R. 2009.** ShortRead: a  
707 bioconductor package for input, quality assessment and exploration of high-throughput  
708 sequence data. *Bioinformatics (Oxford, England)* **25**(19): 2607-2608.
- 709 **Nguyen NH, Smith D, Peay K, Kennedy P. 2015.** Parsing ecological signal from noise in next  
710 generation amplicon sequencing. *The New phytologist* **205**(4): 1389-1393.
- 711 **Nguyen NH, Song Z, Bates ST, Branco S, Tedersoo L. 2016.** FUNGuild: An open annotation  
712 tool for parsing fungal community datasets by ecological guild - ScienceDirect. *Fungal*  
713 *Ecology*.
- 714 **Oliver AK, Brown SP, Callahan MA, Jumpponen A. 2015.** Polymerase matters: non-  
715 proofreading enzymes inflate fungal community richness estimates by up to 15 %.  
716 *Fungal Ecology*.
- 717 **Philippe E, Franck L, Jan P. 2015.** Accurate multiplexing and filtering for high-throughput  
718 amplicon-sequencing. *Nucleic Acids Research*: gkv107.
- 719 **Pinto AJ, Raskin L. 2012.** PCR biases distort bacterial and archaeal community structure in  
720 pyrosequencing datasets. *PLoS One* **7**(8): e43093.
- 721 **Polz MF, Cavanaugh CM. 1998.** Bias in template-to-product ratios in multitemplate PCR.  
722 *Applied and Environmental Microbiology* **64**(10): 3724-3730.
- 723 **Quast C, Pruesse E, Yilmaz P, Gerken J, Schweer T, Yarza P, Peplies J, Glockner FO.**  
724 **2013.** The SILVA ribosomal RNA gene database project: improved data processing and  
725 web-based tools. *Nucleic Acids Research* **41**(Database issue): D590-596.
- 726 **Rognes T, Flouri T, Nichols B, Quince C, Mahé F. 2016.** VSEARCH: a versatile open source  
727 tool for metagenomics. *PeerJ* **4**: e2584.
- 728 **Roper M, Ellison C, Taylor JW, Glass NL. 2011.** Nuclear and genome dynamics in  
729 multinucleate ascomycete fungi. *Current Biology* **21**(18): R786-793.
- 730 **Schloss PD, Westcott SL, Ryabin T, Hall JR, Hartmann M, Hollister EB, Lesniewski RA,**  
731 **Oakley BB, Parks DH, Robinson CJ, et al. 2009.** Introducing mothur: open-source,  
732 platform-independent, community-supported software for describing and comparing  
733 microbial communities. *Applied and Environmental Microbiology* **75**(23): 7537-7541.

- 734 **Schnell IB, Bohmann K, Gilbert MTP. 2015.** Tag jumps illuminated—reducing sequence-to-  
735 sample misidentifications in metabarcoding studies. *Molecular Ecology Resources* **15**(6):  
736 1289-1303.
- 737 **Schoch CL, Seifert KA, Huhndorf S, Robert V, Spouge JL, Levesque CA, Chen W,**  
738 **Bolchacova E, Voigt K, Crous PW. 2012.** Nuclear ribosomal internal transcribed  
739 spacer (ITS) region as a universal DNA barcode marker for Fungi. *Proceedings of the*  
740 *National Academy of Sciences* **109**(16): 6241-6246.
- 741 **Simon UK, Weiss M. 2008.** Intragenomic variation of fungal ribosomal genes is higher than  
742 previously thought. *Molecular Biology and Evolution* **25**(11): 2251-2254.
- 743 **Smith DP, Peay KG. 2014.** Sequence depth, not PCR replication, improves ecological  
744 inference from next generation DNA sequencing. *PloS One* **9**(2): e90234.
- 745 **Šošić M, Šikic M. 2017.** Edlib: a C/C++ library for fast, exact sequence alignment using edit  
746 distance. *Bioinformatics (Oxford, England)* **33**(9): 1394-1395.
- 747 **Taylor DL, Walters WA, Lennon NJ, Bochicchio J, Krohn A, Caporaso JG, Pennanen T.**  
748 **2016.** Accurate estimation of fungal diversity and abundance through improved lineage-  
749 specific primers optimized for Illumina amplicon sequencing. *Applied and Environmental*  
750 *Microbiology* **82**(24): 7217-7226.
- 751 **Tonge DP, Pashley CH, Gant TW. 2014.** Amplicon-based metagenomic analysis of mixed  
752 fungal samples using proton release amplicon sequencing. *PloS One* **9**(4): e93849.
- 753 **van der Walt Sf, Colbert SC, Varoquaux GI. 2011.** The NumPy Array: A Structure for Efficient  
754 Numerical Computation. *Computing in Science & Engineering* **13**(2): 22-30.
- 755 **Vesty A, Biswas K, Taylor MW, Gear K, Douglas RG. 2017.** Evaluating the impact of DNA  
756 extraction method on the representation of human oral bacterial and fungal communities.  
757 *PloS One* **12**(1): e0169877.
- 758 **Wang Q, Garrity GM, Tiedje JM, Cole JR. 2007.** Naive Bayesian classifier for rapid  
759 assignment of rRNA sequences into the new bacterial taxonomy. *Applied and*  
760 *Environmental Microbiology* **73**(16): 5261-5267.
- 761 **White T, Bruns TD, Lee S, Taylor J. 1990.** Amplification and direct sequencing of fungal  
762 ribosomal RNA genes for phylogenetics. *PCR protocols: a guide to methods and*  
763 *applications*: 315 - 322.
- 764 **Wright ES, Vetsigian KH. 2016.** Quality filtering of Illumina index reads mitigates sample cross-  
765 talk. *BMC Genomics* **17**(1): 876.
- 766 **Wu J-Y, Jiang X-T, Jiang Y-X, Lu S-Y, Zou F, Zhou H-W. 2010.** Effects of polymerase,  
767 template dilution and cycle number on PCR based 16 S rRNA diversity analysis using  
768 the deep sequencing method. *BMC Microbiology* **10**: 255.
- 769
- 770
- 771
- 772

773 Supplemental Figures

| Species                           | ITS2 Length (bp) | GC Content (%) | Homopolymer stretches > 5 | Mock ID | 25 Cycles |       |       |        | 30 Cycles |       |       |        |        | 37 Cycles |       |       |       |        |        | PCR-Stds |         |         |          |
|-----------------------------------|------------------|----------------|---------------------------|---------|-----------|-------|-------|--------|-----------|-------|-------|--------|--------|-----------|-------|-------|-------|--------|--------|----------|---------|---------|----------|
|                                   |                  |                |                           |         | 1:20      | 1:100 | 1:200 | 1:2000 | 1:20      | 1:100 | 1:200 | 1:2000 | 1:8000 | 1:32000   | 1:20  | 1:100 | 1:200 | 1:2000 | 1:8000 |          | 1:32000 | 1:64000 | 1:128000 |
| <i>Phialocephala sp.</i>          | 237              | 68.4%          | 0                         | mock1   | 927       | 1277  | 895   | 580    | 0         | 0     | 1     | 8      | 0      | 0         | 2     | 0     | 3     | 5      | 1      | 0        | 0       | 0       | 4583     |
| <i>Ascomycete sp.</i>             | 238              | 50.8%          | 0                         | mock2   | 6680      | 7229  | 7813  | 6779   | 7381      | 5470  | 8009  | 10078  | 8048   | 5657      | 12334 | 7161  | 7621  | 7532   | 8979   | 5976     | 5378    | 2618    | 5436     |
| <i>Phialocephala lagerbergii</i>  | 238              | 58.8%          | 0                         | mock3   | 8199      | 7780  | 8103  | 6231   | 9047      | 6367  | 10676 | 9456   | 8215   | 6000      | 15257 | 7334  | 8505  | 7278   | 9258   | 5446     | 6356    | 2836    | 4770     |
| <i>Helotiales sp.</i>             | 239              | 57.3%          | 0                         | mock4   | 8487      | 8371  | 9066  | 7961   | 9549      | 6879  | 11353 | 12028  | 10023  | 6423      | 15799 | 8077  | 8757  | 8966   | 10896  | 6915     | 7148    | 3153    | 4608     |
| <i>Aspergillus sp.</i>            | 260              | 65.8%          | 3                         | mock5   | 780       | 462   | 502   | 328    | 3         | 4     | 8     | 35     | 3      | 1         | 15    | 50    | 53    | 29     | 9      | 0        | 0       | 2       | 3369     |
| <i>Bjerkandera adusta</i>         | 281              | 51.2%          | 0                         | mock6   | 4511      | 5064  | 4986  | 5718   | 4808      | 4239  | 5464  | 6951   | 6038   | 4322      | 8496  | 4999  | 5319  | 5888   | 6859   | 5293     | 4365    | 2559    | 4327     |
| <i>Laetiporus caribensis</i>      | 283              | 52.7%          | 0                         | mock7   | 2848      | 3757  | 3446  | 3619   | 3206      | 2588  | 3101  | 5421   | 3950   | 3698      | 5910  | 2700  | 3663  | 3404   | 4160   | 3100     | 3810    | 1525    | 2918     |
| <i>Trametes gibbosa</i>           | 288              | 50.0%          | 1                         | mock8   | 3082      | 4620  | 4296  | 5075   | 4431      | 3697  | 4319  | 5817   | 4972   | 3747      | 7421  | 4599  | 4665  | 5006   | 5311   | 4305     | 3966    | 1709    | 3902     |
| <i>Laetiporus gilbertsonii</i>    | 290              | 54.1%          | 0                         | mock9   | 8004      | 8675  | 8203  | 6420   | 9503      | 7279  | 10708 | 7268   | 7758   | 6967      | 16299 | 8715  | 8860  | 6438   | 7270   | 6902     | 7910    | 3734    | 4222     |
| <i>Gloeoporus pannocinctus</i>    | 292              | 43.8%          | 0                         | mock10  | 3002      | 3751  | 3413  | 3483   | 2673      | 2492  | 2026  | 3141   | 2763   | 3120      | 4868  | 3323  | 3023  | 2488   | 2959   | 3458     | 2868    | 1400    | 3137     |
| <i>Wolfiporia dilatohypha</i>     | 293              | 54.6%          | 0                         | mock11  | 371       | 318   | 310   | 153    | 314       | 229   | 207   | 145    | 137    | 319       | 610   | 359   | 236   | 110    | 190    | 159      | 212     | 81      | 4025     |
| <i>Trichaptum sp.</i>             | 293              | 48.1%          | 0                         | mock12  | 4410      | 4950  | 4916  | 5171   | 4491      | 3871  | 4481  | 5659   | 5042   | 3913      | 7994  | 4847  | 5064  | 4687   | 5252   | 4420     | 4685    | 2030    | 4034     |
| <i>Fomitopsis ochracea</i>        | 295              | 44.1%          | 0                         | mock13  | 1846      | 2299  | 2201  | 2568   | 1744      | 1550  | 1424  | 2488   | 2172   | 2186      | 2798  | 2144  | 1847  | 1947   | 2095   | 2160     | 2057    | 1086    | 3802     |
| <i>Laetiporus cremeioporos</i>    | 296              | 54.7%          | 0                         | mock14  | 6952      | 7385  | 7091  | 6608   | 7963      | 6548  | 9466  | 7727   | 7282   | 6043      | 14270 | 7827  | 8122  | 7165   | 7170   | 7030     | 8207    | 3767    | 4173     |
| <i>Phanerochaete laevis</i>       | 300              | 47.7%          | 1                         | mock15  | 5196      | 6167  | 5789  | 5396   | 5487      | 4786  | 4801  | 5581   | 5157   | 5718      | 9523  | 5944  | 5510  | 4905   | 5452   | 5595     | 5678    | 2843    | 4218     |
| <i>Laetiporus cincinnatus</i>     | 302              | 54.0%          | 0                         | mock16  | 5999      | 6456  | 5775  | 4654   | 6118      | 5093  | 5982  | 4773   | 4680   | 5337      | 10877 | 6397  | 6059  | 4262   | 4697   | 4592     | 5494    | 10885   | 3433     |
| <i>Punctularia strigosozonata</i> | 303              | 53.1%          | 0                         | mock17  | 4446      | 4748  | 4376  | 4838   | 4845      | 3968  | 5127  | 5744   | 4977   | 4100      | 8994  | 5187  | 5119  | 5201   | 5556   | 4437     | 4186    | 1997    | 3940     |
| <i>Phellinus cinereus</i>         | 314              | 49.7%          | 0                         | mock18  | 1809      | 2121  | 2006  | 2306   | 1776      | 1683  | 1562  | 2460   | 1862   | 1575      | 3170  | 2502  | 1953  | 2391   | 2111   | 2219     | 1846    | 826     | 3724     |
| <i>Junghuhnia lacera</i>          | 315              | 43.8%          | 1                         | mock19  | 1883      | 2011  | 1833  | 1944   | 1572      | 1493  | 1114  | 1452   | 1456   | 1873      | 2622  | 2055  | 1646  | 1299   | 1568   | 1667     | 1617    | 1267    | 1985     |
| <i>Leptoporus mollis</i>          | 315              | 45.4%          | 3                         | mock20  | 2521      | 3098  | 2692  | 3812   | 2551      | 2375  | 1891  | 3732   | 3096   | 2681      | 4538  | 3189  | 2816  | 3524   | 2991   | 3028     | 2411    | 1331    | 3523     |
| <i>Leptoporus mollis 2</i>        | 315              | 45.1%          | 1                         | mock21  | 359       | 299   | 305   | 311    | 179       | 177   | 115   | 269    | 166    | 170       | 245   | 513   | 233   | 215    | 166    | 271      | 180     | 57      | 3622     |
| <i>Mortierellales sp.</i>         | 353              | 45.0%          | 0                         | mock22  | 2789      | 3334  | 2662  | 3704   | 2728      | 2648  | 2327  | 3589   | 3069   | 2526      | 5307  | 3693  | 2814  | 4355   | 3120   | 2846     | 3220    | 1251    | 3618     |
| <i>Laetiporus persicinus</i>      | 379              | 51.2%          | 2                         | mock23  | 1858      | 2077  | 1845  | 2270   | 1742      | 1567  | 1395  | 1852   | 1640   | 1680      | 3273  | 2332  | 1549  | 2700   | 1736   | 1351     | 1578    | 704     | 2582     |
| <i>Penicillium sp.</i>            | 260              | 66.2%          | 1                         | mock24  | 142       | 103   | 106   | 81     | 0         | 0     | 0     | 3      | 0      | 0         | 0     | 0     | 0     | 0      | 0      | 0        | 0       | 0       | 3509     |
| <i>Verticillium sp.</i>           | 291              | 64.6%          | 1                         | mock25  | 0         | 2     | 0     | 5      | 0         | 0     | 0     | 0      | 0      | 0         | 0     | 0     | 0     | 0      | 0      | 0        | 0       | 0       | 1746     |
| <i>Wolfiporia cocos</i>           | 548              | 59.7%          | 0                         | mock26  | 3         | 0     | 0     | 1      | 0         | 0     | 0     | 1      | 1      | 0         | 1     | 1     | 1     | 2      | 1      | 1        | 0       | 0       | 1        |

774

775 **Figure S1.** Read abundances do not correlate with actual abundances even when DNA  
 776 concentration is high and PCR cycles are low. Creating libraries of the equimolar BioMock  
 777 community by varying PCR cycles and DNA concentrations for sequencing on the Ion Torrent  
 778 PGM did little to change read abundances. However, these data are consistent with traditional  
 779 recommendations to use as few PCR cycles as possible during library prep.

780

781



**All data: Figure 4  
from main text**

| ID     | Ion Torrent PGM |        |         |         | Illumina MiSeq |        |         |         |
|--------|-----------------|--------|---------|---------|----------------|--------|---------|---------|
|        | Stds            | Mock A | Mock B1 | Mock B2 | Stds           | Mock A | Mock B1 | Mock B2 |
| mock1  | 4905            | 19     | 6       | 1       | 8615           | 725    | 329     | 3337    |
| mock2  | 5106            | 11651  | 10809   | 11877   | 9174           | 20763  | 26129   | 18341   |
| mock3  | 4886            | 13479  | 12111   | 13392   | 8648           | 28515  | 29482   | 21269   |
| mock4  | 4233            | 15219  | 13048   | 14896   | 9050           | 27726  | 32576   | 24276   |
| mock5  | 2813            | 31     | 23      | 3       | 8992           | 147    | 122     | 269     |
| mock6  | 3977            | 8112   | 7172    | 7787    | 13597          | 13112  | 13866   | 15067   |
| mock7  | 3330            | 7810   | 6457    | 6365    | 9404           | 15035  | 16622   | 16385   |
| mock8  | 3637            | 7281   | 6914    | 6865    | 8137           | 13819  | 14579   | 14787   |
| mock9  | 4066            | 8831   | 10401   | 12638   | 8751           | 22860  | 21680   | 20682   |
| mock10 | 2603            | 2922   | 3025    | 2567    | 9718           | 11150  | 11792   | 14265   |
| mock11 | 3957            | 94     | 110     | 109     | 8775           | 243    | 224     | 194     |
| mock12 | 4037            | 6965   | 7030    | 6626    | 8676           | 12857  | 13947   | 14860   |
| mock13 | 3689            | 2913   | 2860    | 2651    | 9471           | 5522   | 5432    | 6883    |
| mock14 | 3922            | 10279  | 11920   | 12440   | 8262           | 16454  | 16390   | 16798   |
| mock15 | 3863            | 6970   | 7650    | 6876    | 9242           | 15667  | 15543   | 18168   |
| mock16 | 3133            | 5699   | 7645    | 7505    | 7675           | 16819  | 16157   | 14608   |
| mock17 | 4019            | 8271   | 7688    | 8217    | 7669           | 10701  | 11572   | 11671   |
| mock18 | 3672            | 2937   | 2985    | 2597    | 9807           | 6314   | 5953    | 7496    |
| mock19 | 3089            | 3047   | 3406    | 2741    | 9297           | 9356   | 8990    | 11593   |
| mock20 | 3551            | 4969   | 4320    | 4028    | 9047           | 8847   | 8747    | 9987    |
| mock21 | 3776            | 207    | 366     | 249     | 9250           | 405    | 302     | 414     |
| mock22 | 3264            | 4668   | 4311    | 3812    | 9151           | 10865  | 9728    | 13365   |
| mock23 | 2147            | 2651   | 2385    | 2053    | 6486           | 488    | 421     | 521     |
| mock24 | 3644            | NA     | NA      | NA      | 8278           | NA     | NA      | NA      |
| mock25 | 1976            | NA     | NA      | NA      | 2045           | NA     | NA      | NA      |
| mock26 | 7               | NA     | NA      | NA      | 5979           | NA     | NA      | NA      |

**Random sub-sample  
100,000 reads per sample**

| ID     | Ion Torrent PGM |        |         |         | Illumina MiSeq |        |         |         |
|--------|-----------------|--------|---------|---------|----------------|--------|---------|---------|
|        | Stds            | Mock A | Mock B1 | Mock B2 | Stds           | Mock A | Mock B1 | Mock B2 |
| mock1  | 4563            | 8      | 1       | 0       | 3604           | 231    | 117     | 1156    |
| mock2  | 4726            | 6072   | 5711    | 6016    | 3833           | 7253   | 8834    | 6319    |
| mock3  | 4585            | 7063   | 6309    | 6766    | 3601           | 10030  | 9996    | 7320    |
| mock4  | 3929            | 7959   | 6899    | 7690    | 3790           | 9784   | 10999   | 8277    |
| mock5  | 2599            | 14     | 12      | 1       | 3810           | 52     | 37      | 88      |
| mock6  | 3677            | 4200   | 3738    | 4023    | 5685           | 4575   | 4672    | 5208    |
| mock7  | 3111            | 4037   | 3436    | 3222    | 4020           | 5366   | 5628    | 5631    |
| mock8  | 3400            | 3881   | 3628    | 3457    | 3454           | 4917   | 5052    | 5110    |
| mock9  | 3799            | 4520   | 5528    | 6404    | 3702           | 8073   | 7309    | 7095    |
| mock10 | 2425            | 1549   | 1610    | 1327    | 4134           | 3919   | 4037    | 4922    |
| mock11 | 3667            | 47     | 53      | 45      | 3719           | 87     | 88      | 64      |
| mock12 | 3764            | 3676   | 3685    | 3491    | 3756           | 4530   | 4752    | 5017    |
| mock13 | 3418            | 1506   | 1521    | 1417    | 4015           | 1958   | 1842    | 2361    |
| mock14 | 3650            | 5442   | 6324    | 6285    | 3501           | 5780   | 5557    | 5723    |
| mock15 | 3600            | 3644   | 4062    | 3525    | 3942           | 5448   | 5186    | 6198    |
| mock16 | 2918            | 3057   | 3986    | 3789    | 3100           | 5933   | 5333    | 5124    |
| mock17 | 3734            | 4327   | 4049    | 4204    | 3203           | 3756   | 3903    | 4080    |
| mock18 | 3426            | 1556   | 1584    | 1335    | 4061           | 2216   | 2073    | 2528    |
| mock19 | 2876            | 1566   | 1800    | 1400    | 3920           | 3310   | 2945    | 4095    |
| mock20 | 3303            | 2605   | 2230    | 2049    | 3807           | 3124   | 2896    | 3560    |
| mock21 | 3514            | 116    | 209     | 134     | 3859           | 158    | 116     | 128     |
| mock22 | 3042            | 2445   | 2291    | 1965    | 3893           | 3824   | 3256    | 4559    |
| mock23 | 2003            | 1368   | 1283    | 1055    | 2704           | 167    | 141     | 221     |
| mock24 | 3374            | NA     | NA      | NA      | 3613           | NA     | NA      | NA      |
| mock25 | 1855            | NA     | NA      | NA      | 896            | NA     | NA      | NA      |
| mock26 | 7               | NA     | NA      | NA      | 2567           | NA     | NA      | NA      |

782

783

784

785

786

787

**Figure S2.** Random subsampling reads for each sample does not improve accuracy of read abundances. Each sample was randomly sub-sampled to 100,000 reads using ‘amptk sample’ and then reads were mapped to the BioMock community. Chi-square test for each of these BioMock samples was significant ( $p < 0.001$ ), indicating the read abundances are not equally distributed.

788

| Illumina MiSeq Run 1 |          |          |          |          |          |          |          |          |          |          | Same Libraries<br>no mocks in run |          |          |          |
|----------------------|----------|----------|----------|----------|----------|----------|----------|----------|----------|----------|-----------------------------------|----------|----------|----------|
|                      | Std's    | Mock A   | Mock B1  | Mock B2  | 755-1    | 755-2    | 744-1    | 744-2    | 766-1    | 766-2    | 744-1                             | 744-2    | 766-1    | 766-2    |
| i5 index             | ACTGAGCG | ACTGAGCG | ACTGAGCG | ACTGAGCG | TAGCGCTC | TAGCGCTC | TAGCGCTC | TAGCGCTC | TAGCGCTC | TAGCGCTC | TAGCGCTC                          | TAGCGCTC | TAGCGCTC | TAGCGCTC |
| i7 index             | GGCTCTGA | TATAGCCT | ATAGAGGC | CCTATCCT | AGCGGAAG | TAATCTTA | CCTATCCT | GGCTCTGA | TATAGCCT | ATAGAGGC | CCTATCCT                          | GGCTCTGA | TATAGCCT | ATAGAGGC |
| mock1                | 8615     | 725      | 329      | 3337     | 0        | 0        | 9        | 24       | 2        | 0        | 0                                 | 0        | 0        | 0        |
| mock2                | 9174     | 20763    | 26129    | 18341    | 0        | 0        | 42       | 25       | 57       | 55       | 0                                 | 0        | 0        | 0        |
| mock3                | 8648     | 28515    | 29482    | 21269    | 7        | 4        | 79       | 18       | 306      | 580      | 12                                | 4        | 107      | 247      |
| mock4                | 9050     | 27726    | 32576    | 24276    | 0        | 0        | 60       | 17       | 54       | 65       | 0                                 | 0        | 0        | 0        |
| mock5                | 8992     | 147      | 122      | 269      | 0        | 0        | 2        | 17       | 0        | 0        | 0                                 | 0        | 0        | 0        |
| mock6                | 13597    | 13112    | 13866    | 15067    | 0        | 1        | 32       | 24       | 27       | 30       | 0                                 | 0        | 0        | 0        |
| mock7                | 9404     | 15035    | 16622    | 16385    | 0        | 0        | 42       | 28       | 32       | 33       | 0                                 | 0        | 0        | 0        |
| mock8                | 8137     | 13819    | 14579    | 14787    | 0        | 0        | 31       | 13       | 26       | 31       | 0                                 | 0        | 0        | 0        |
| mock9                | 8751     | 22860    | 21680    | 20682    | 0        | 0        | 46       | 24       | 55       | 43       | 0                                 | 0        | 0        | 0        |
| mock10               | 9718     | 11150    | 11792    | 14265    | 0        | 0        | 33       | 18       | 22       | 20       | 0                                 | 0        | 0        | 0        |
| mock11               | 8775     | 243      | 224      | 194      | 0        | 0        | 0        | 11       | 1        | 0        | 0                                 | 0        | 0        | 0        |
| mock12               | 8676     | 12857    | 13947    | 14860    | 0        | 0        | 40       | 16       | 23       | 25       | 0                                 | 0        | 0        | 0        |
| mock13               | 9471     | 5522     | 5432     | 6883     | 0        | 0        | 16       | 18       | 7        | 11       | 0                                 | 0        | 0        | 0        |
| mock14               | 8262     | 16454    | 16390    | 16798    | 0        | 0        | 42       | 18       | 42       | 42       | 0                                 | 0        | 0        | 0        |
| mock15               | 9242     | 15667    | 15543    | 18168    | 0        | 0        | 33       | 18       | 35       | 26       | 0                                 | 0        | 0        | 0        |
| mock16               | 7675     | 16819    | 16157    | 14608    | 0        | 0        | 28       | 20       | 32       | 34       | 0                                 | 0        | 0        | 0        |
| mock17               | 7669     | 10701    | 11572    | 11671    | 0        | 0        | 31       | 10       | 19       | 23       | 0                                 | 0        | 0        | 0        |
| mock18               | 9807     | 6314     | 5953     | 7496     | 0        | 2        | 28       | 11       | 16       | 15       | 0                                 | 0        | 0        | 0        |
| mock19               | 9297     | 9356     | 8990     | 11593    | 0        | 0        | 26       | 23       | 14       | 28       | 0                                 | 0        | 0        | 0        |
| mock20               | 9047     | 8847     | 8747     | 9987     | 0        | 0        | 28       | 19       | 18       | 23       | 0                                 | 0        | 0        | 0        |
| mock21               | 9250     | 405      | 302      | 414      | 0        | 0        | 1        | 17       | 1        | 1        | 0                                 | 0        | 0        | 0        |
| mock22               | 9151     | 10865    | 9728     | 13365    | 0        | 0        | 24       | 23       | 9        | 30       | 0                                 | 0        | 0        | 0        |
| mock23               | 6486     | 488      | 421      | 521      | 0        | 0        | 0        | 19       | 0        | 0        | 0                                 | 0        | 0        | 0        |
| mock24               | 8278     | 0        | 0        | 8        | 0        | 0        | 0        | 13       | 0        | 0        | 0                                 | 0        | 0        | 0        |
| mock25               | 2045     | 0        | 0        | 2        | 0        | 0        | 0        | 6        | 0        | 0        | 0                                 | 0        | 0        | 0        |
| mock26               | 5979     | 0        | 0        | 2        | 0        | 0        | 0        | 12       | 0        | 0        | 0                                 | 0        | 0        | 0        |

789

790 **Figure S3.** Index-bleed on Illumina MiSeq occurs during the sequencing run and is not a result  
 791 of contamination. Sequencing the BioMock on Illumina MiSeq resulted in elevated levels of  
 792 apparent index-bleed during our first run. To rule out that this was a result of contamination  
 793 during library prep/cleanup, the same libraries were sequenced on a second run in the absence  
 794 of any of the BioMock samples. The index-bleed discovered in the first run then disappeared,  
 795 however, one of the BioMock members (mock3) was actually found in these environmental  
 796 samples.

797

798

799

800

801

802



803 **Supplemental Tables**

804  
805 Table S1. Cultures from the CFMR culture collection used to construct the BioMock community.

| Species                           | Voucher ID | Mock ID | ITS2 Length | % GC   | GenBank Accession |
|-----------------------------------|------------|---------|-------------|--------|-------------------|
| <i>Phialocephala fusca</i>        | FP-170182  | mock1   | 237         | 68.35% | KU668953          |
| <i>Ascomycete sp.</i>             | FP-170235  | mock2   | 238         | 50.84% | KU668968          |
| <i>Phialocephala lagerbergii</i>  | FP-170134  | mock3   | 238         | 58.82% | KU668951          |
| <i>Helotiales sp</i>              | RF10JR     | mock4   | 239         | 57.32% | KU668958          |
| <i>Aspergillus candidus</i>       | RF1JR      | mock5   | 260         | 65.77% | KU668969          |
| <i>Bjerkandera adusta</i>         | RF3JR      | mock6   | 281         | 51.25% | KU668970          |
| <i>Laetiporus caribensis</i>      | GDL-1      | mock7   | 283         | 52.65% | KU668960          |
| <i>Trametes gibbosa</i>           | RF5JR      | mock8   | 288         | 50.00% | KU668971          |
| <i>Laetiporus gilbertsonii</i>    | OR-2       | mock9   | 290         | 54.14% | KU668967          |
| <i>Gloeporus pannocinctus</i>     | MR5-1      | mock10  | 292         | 43.84% | KU668965          |
| <i>Wolfiporia dilatohypha</i>     | FP-72162   | mock11  | 293         | 54.61% | KU668959          |
| <i>Schizopora sp.</i>             | FP-170198  | mock12  | 293         | 48.12% | KU668955          |
| <i>Fomitopsis ochracea</i>        | FP-170231  | mock13  | 295         | 44.07% | KU668957          |
| <i>Laetiporus cermeioporos</i>    | L34-2      | mock14  | 296         | 54.73% | KU668963          |
| <i>Phanerochaete laevis</i>       | RF9JR      | mock15  | 300         | 47.67% | KU668973          |
| <i>Laetiporus cincinnatus</i>     | DA-37      | mock16  | 302         | 53.97% | KU668950          |
| <i>Punctularia strigosozonata</i> | RF7JR      | mock17  | 303         | 53.14% | KU668972          |
| <i>Phellinus cinereus</i>         | IN4-1      | mock18  | 314         | 49.68% | KU668962          |
| <i>Antrodiella semisupina</i>     | MR-3       | mock19  | 315         | 43.81% | KU668966          |
| <i>Leptoporus mollis</i>          | TJV-93-174 | mock20  | 315         | 45.40% | KU668975          |
| <i>Leptoporus mollis 2</i>        | RLG-7163   | mock21  | 315         | 45.08% | KU668974          |
| <i>Mortierellales sp</i>          | FP-170186  | mock22  | 353         | 45.04% | KU668954          |
| <i>Laetiporus persicinus</i>      | HHB-9564   | mock23  | 379         | 51.19% | KU668961          |
| <i>Penicillium nothofagi</i>      | FP-170215  | mock24  | 260         | 66.15% | KU668956          |
| <i>Metapochonia suchlasporia</i>  | FP-170177  | mock25  | 291         | 64.60% | KU668952          |
| <i>Wolfiporia cocos</i>           | MD-275     | mock26  | 548         | 59.67% | KU668964          |

806  
807  
808  
809  
810  
811  
812  
813

814 Table S2. OTU clustering results using default QIIME pre-processing of reads.

| Platform                 | Clustering method | Reads      | Total OTUs | Mock OTUs (n = 12) | Error Rate (mismatches / total) |
|--------------------------|-------------------|------------|------------|--------------------|---------------------------------|
| Ion Torrent PGM (400 bp) | UCLUST            | 2 562 316  | 97 175     | 1 347              | 3.760%                          |
|                          | USEARCH           | 2 562 316  | 9 812      | 560                | 4.237%                          |
|                          | SWARM             | 2 562 316  | 276 403    | 225                | 3.517%                          |
|                          | UPARSE            | 2 562 316  | 1 609      | 82                 | 1.100%                          |
| Illumina Miseq (2 x 300) | UCLUST            | 15 696 636 | 122 802    | 528                | 0.131%                          |
|                          | USEARCH           | 15 696 636 | 9 785      | 545                | 4.694%                          |
|                          | SWARM             | 15 696 636 | 614 133    | 165                | 4.447%                          |
|                          | UPARSE            | 15 696 636 | 2 483      | 38                 | 0.077%                          |

815

816

817 Table S3. Expected errors quality trimming removes most errors from Ion Torrent PGM data  
818 using 12 member SynMock community.<sup>1</sup>

| Method          | Aligned reads | Subst. errors | Indel errors | UPARSE OTUs | OTUs (chimera filtered) |
|-----------------|---------------|---------------|--------------|-------------|-------------------------|
| No Qual Filter  | 67 185        | 0.237%        | 0.342%       | 26          | 21                      |
| Cutadapt -q 25  | 73 092        | 0.152%        | 0.222%       | 28          | 26                      |
| Seqtk (Phred)   | 75 535        | 0.204%        | 0.314%       | 83          | 79                      |
| Sickle -q 25    | 71 221        | 0.098%        | 0.087%       | 31          | 30                      |
| Exp. Errors < 1 | 35 810        | 0.078%        | 0.100%       | 18          | 14                      |

819 <sup>1</sup> Total of 78,525 reads from the SynMock Ion Torrent PGM run demuxed with AMPtk.

820

821 Table S4. Expected errors quality trimming removes most errors from Illumina MiSeq data using  
822 12 member SynMock community.<sup>1</sup>

| Method          | Aligned reads | Subst. errors | Indel errors | UPARSE OTUs | OTUs (chimera filtered) |
|-----------------|---------------|---------------|--------------|-------------|-------------------------|
| No Qual Filter  | 1 081 931     | 0.333%        | 0.006%       | 44          | 27                      |
| Cutadapt -q 25  | 1 148 274     | 0.253%        | 0.007%       | 361         | 337                     |
| Seqtk (Phred)   | 1 115 657     | 0.316%        | 0.007%       | 173         | 150                     |
| Sickle          | 1 153 190     | 0.166%        | 0.006%       | 304         | 285                     |
| Exp. Errors < 1 | 961 458       | 0.094%        | 0.006%       | 45          | 27                      |

823 <sup>1</sup> Total of 1,167,662 reads from the SynMock Illumina MiSeq run demuxed with AMPtk.

824

825 Table S5. Summary statistics for the HTAS runs used in this study.

| Run    | Platform        | Total Reads | Valid Reads | Num Samples | Range reads per sample | Total UPARSE OTUs | Mock Community | Mock Calculated Error Rate | Index-Bleed |
|--------|-----------------|-------------|-------------|-------------|------------------------|-------------------|----------------|----------------------------|-------------|
| Mock3  | Ion Torrent PGM | 4,332,502   | 3,029,824   | 19          | 107,416 - 217,372      | 1,010             | BioMock        | 0.086%                     | 0.033%      |
| Mock4a | Illumina Miseq  | 5,668,955   | 5,661,700   | 20          | 237,035 - 334,455      | 1,778             | BioMock        | 0.019%                     | 0.264%      |
| Mock4b | Illumina Miseq  | 659,738     | 658,730     | 4           | 145,405 - 191,095      | 477               | None           | NA                         | NA          |
| Mock4c | Illumina Miseq  | 6,103,680   | 6,096,296   | 20          | 221,130 - 392,118      | 1,625             | BioMock        | 0.020%                     | 0.233%      |
| Mock5  | Ion Torrent PGM | 4,341,392   | 2,602,544   | 21          | 59,394 - 254,269       | 927               | SynMock        | 0.099%                     | 0.156%      |
| Mock6  | Illumina Miseq  | 18,005,575  | 17,979,995  | 21          | 623,128 - 1,167,662    | 2,497             | SynMock        | 0.082%                     | 0.046%      |

826

827

828

829
